# Supplementary material for: Reciprocal genomic evolution in the ant–fungus agricultural symbiosis
Source: PubMed Central journal article supplement (PMC4961791; doi:10.1038/ncomms12233), 2016-07-20
Supplement: ncomms12233-s1.pdf [file ncomms12233-s1.pdf]

1 **Supplementary Figures**  
2

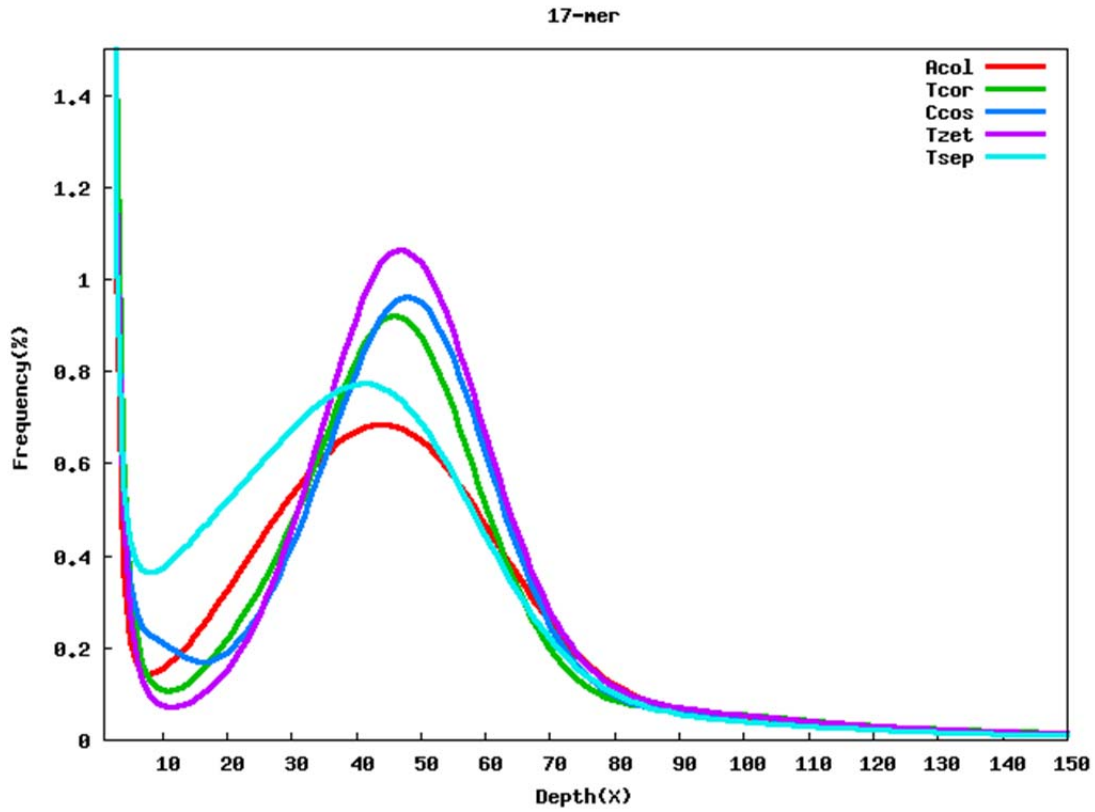

3

4 **Supplementary Figure 1. K-mer distributions of ant assemblies**

5 17-mer frequency distributions of attine ant genome assemblies, using approximately 50×  
6 coverage of reads for each assembly: *Atta colombica* (Acol), *Trachymyrmex septentrionalis*  
7 (Tsep), *T. cornetzi* (Tcor), *T. zeteki* (Tzet), and *Cyphomyrmex costatus* (Ccos).

8

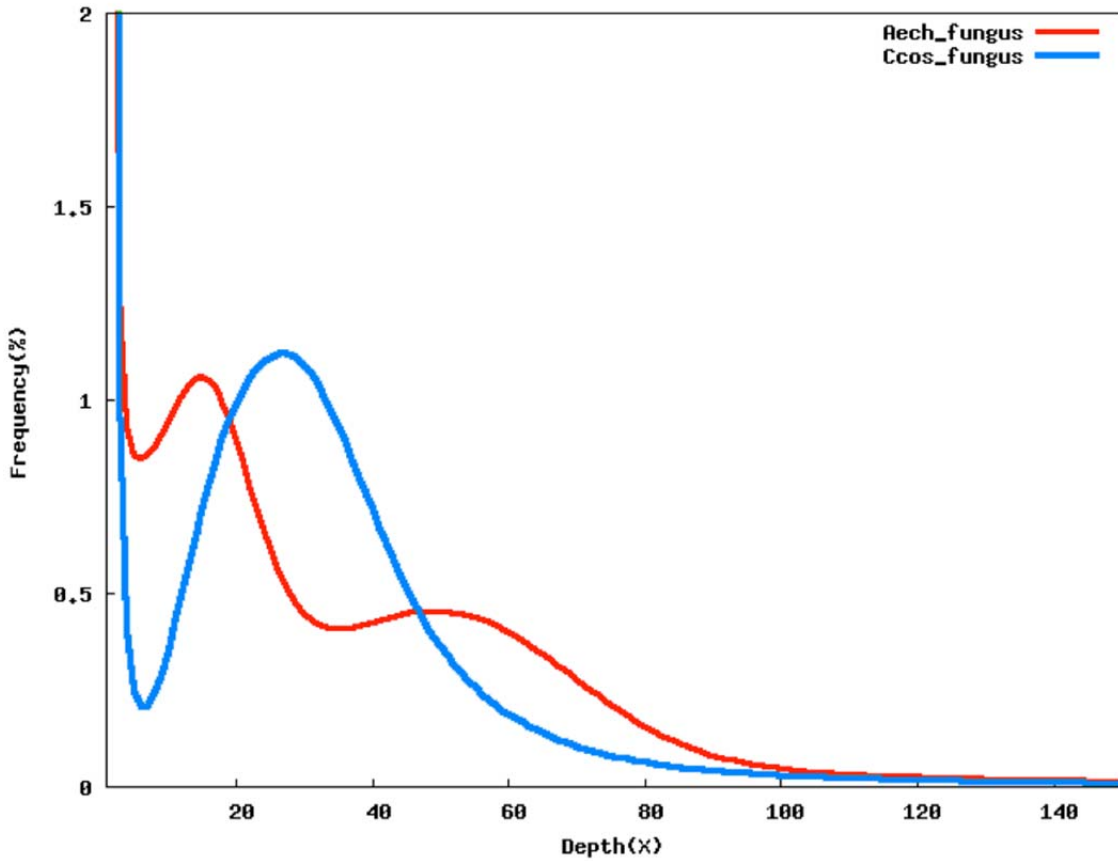

9  
10

11 **Supplementary Figure 2. K-mer distributions of cultivar assemblies**  
 12 17-mer frequency distributions of fungal genome assemblies, showing a single peak for the  
 13 cultivar of *C. costatus* (Ccos\_fungus, blue), but two distinct peaks for the functionally  
 14 allopolyploid cultivar of *Acromyrmex echinator* (Aech\_fungus, red).

15  
16

17  
18

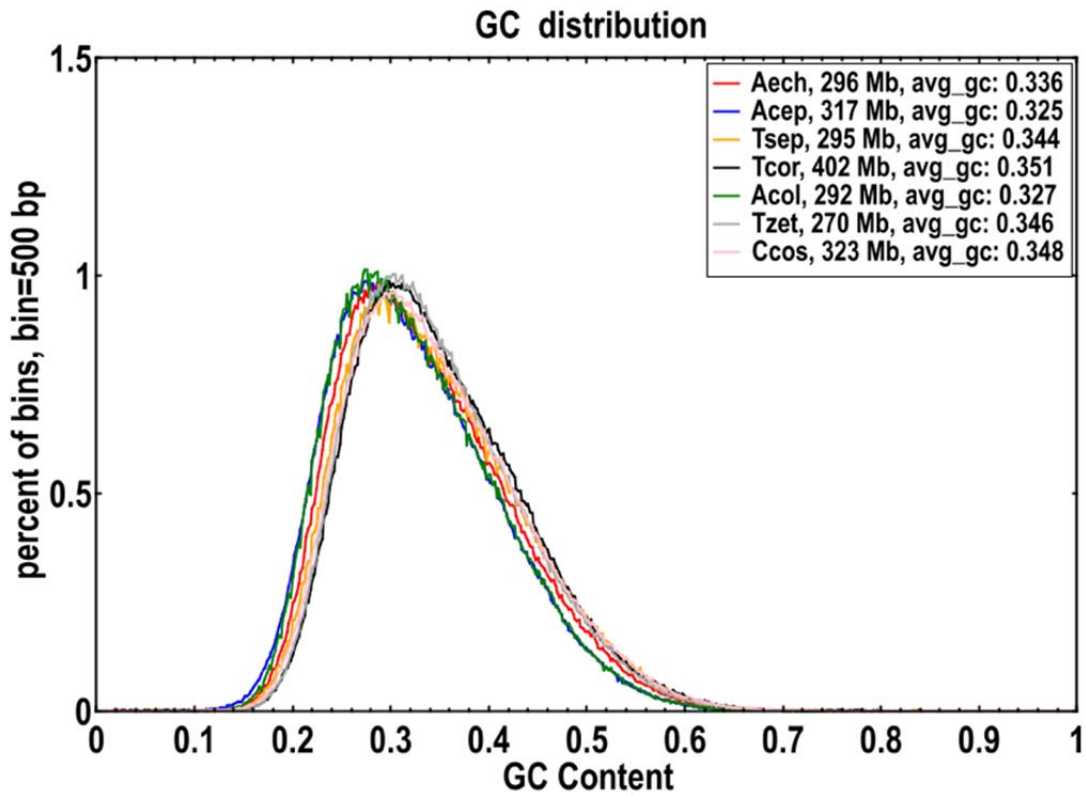

19

20 **Supplementary Figure 3. GC content distributions across the attine ant genome assemblies**

21 The X-axis shows the GC content and the Y-axis the proportion of non-overlapping sliding  
22 windows of 500 bp. The legend shows species IDs (abbreviations as above, plus *Atta cephalotes*  
23 (*Acep*)), genome assembly sizes, and the average GC content. The ant genome assemblies have  
24 very similar GC content distributions with a peak of approximately 30% GC.

25  
26

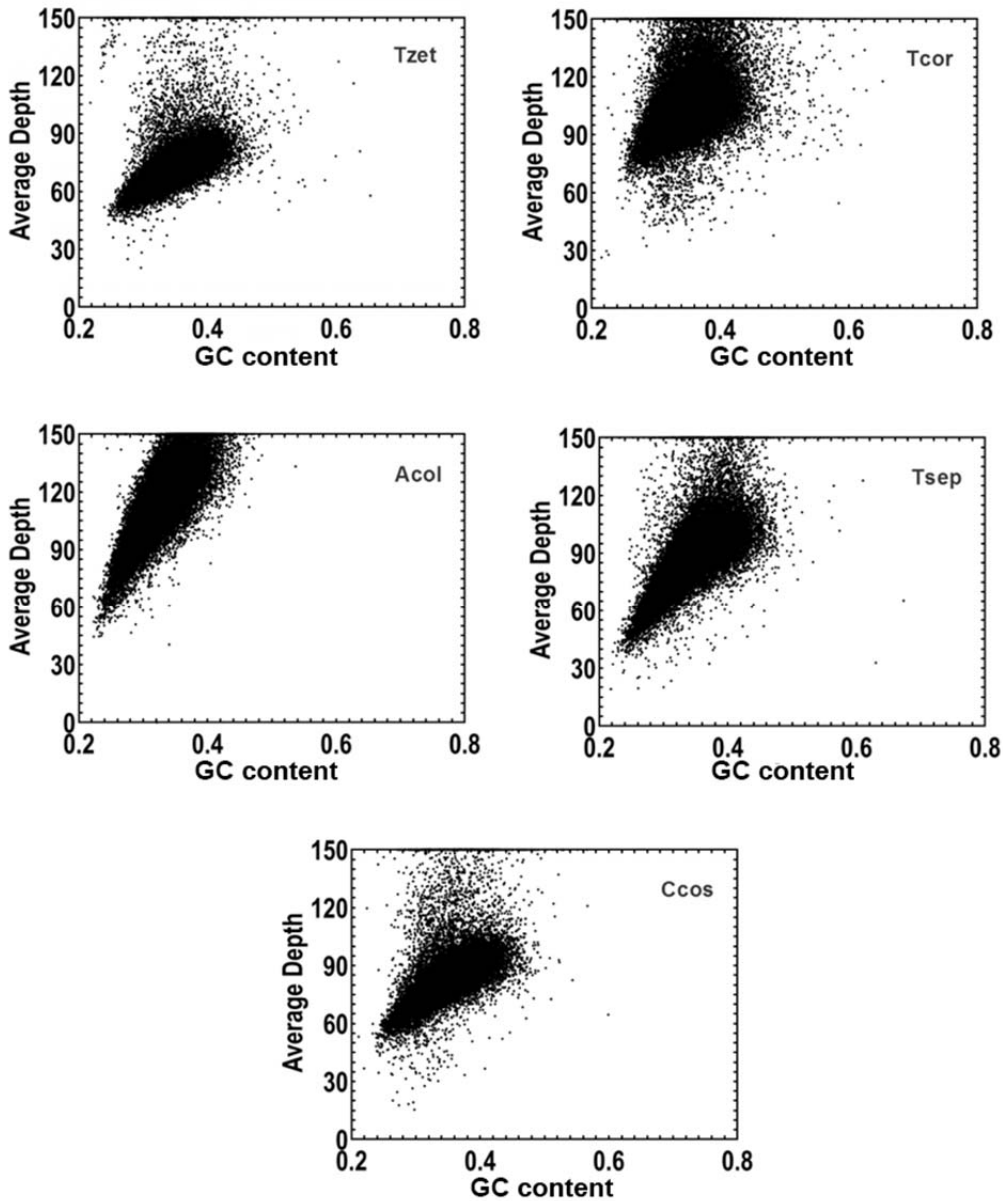

28

### 29 **Supplementary Figure 4. Ant GC content versus sequencing depth**

30 Correlation between GC (Guanine-Cytosine) content and sequencing depth in the five attine ant  
 31 genome assemblies. The X-axis represents GC content; the Y-axis represents average sequencing  
 32 depth. We used 10kb non-overlapping sliding windows and calculated GC content and average  
 33 depth across these windows.

34

35

36  
37

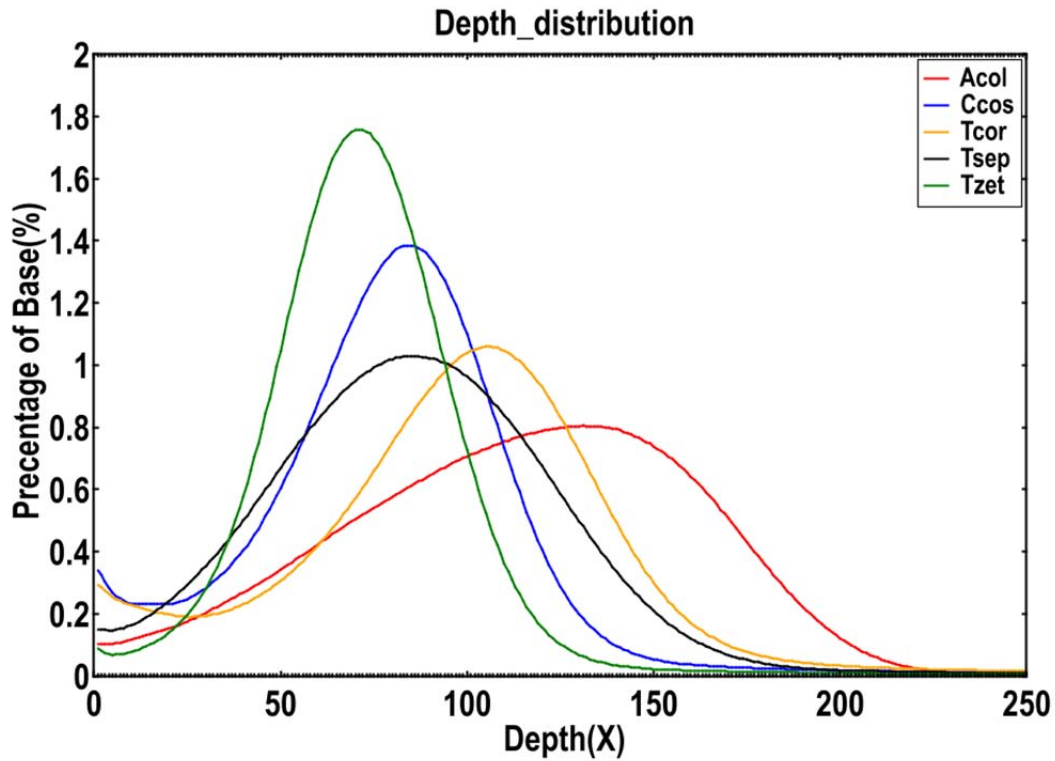

38

39 **Supplementary Figure 5. Ant coverage distributions**

40 Sequencing depth (coverage) distributions for the attine ant genome assemblies. The X-axis  
41 represents sequencing depth and the Y-axis represents the proportion of total bases at a given  
42 depth. To generate these distributions the clean reads were aligned onto the assembled genome  
43 sequence allowing for 2 mismatches for 44bp reads and 5 mismatches for the longer reads.

44  
45

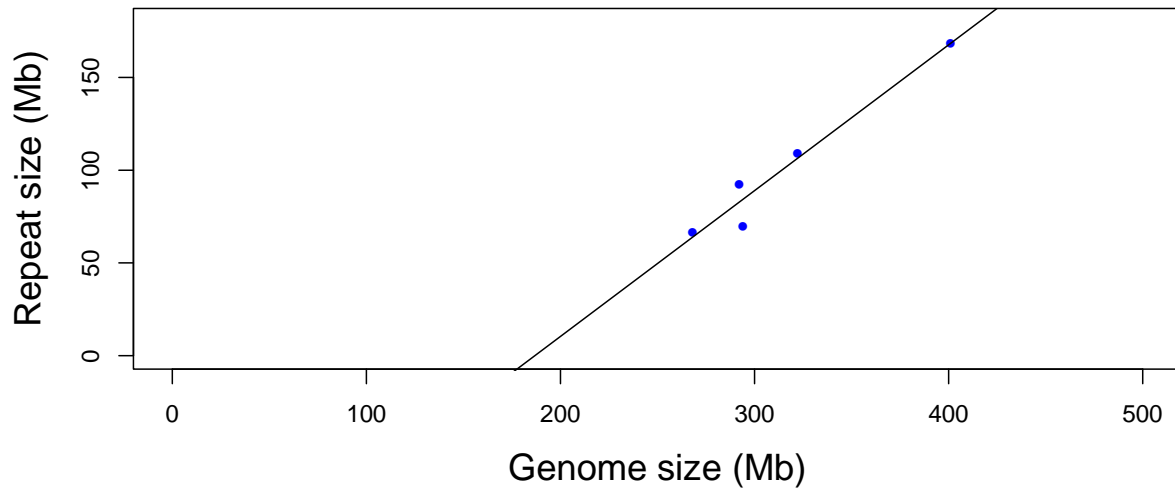

46  
47

48 **Supplementary Figure 6. Ant repeat versus assembly size**

49 Total assembly size (X-axis) versus total repeat content (Y-axis) in the five ant genome  
50 assemblies. These numbers are linearly correlated (Pearson  $R = 0.976$ ,  $P < 0.005$ ), with an  
51 intercept just below 200 Mb.

52  
53

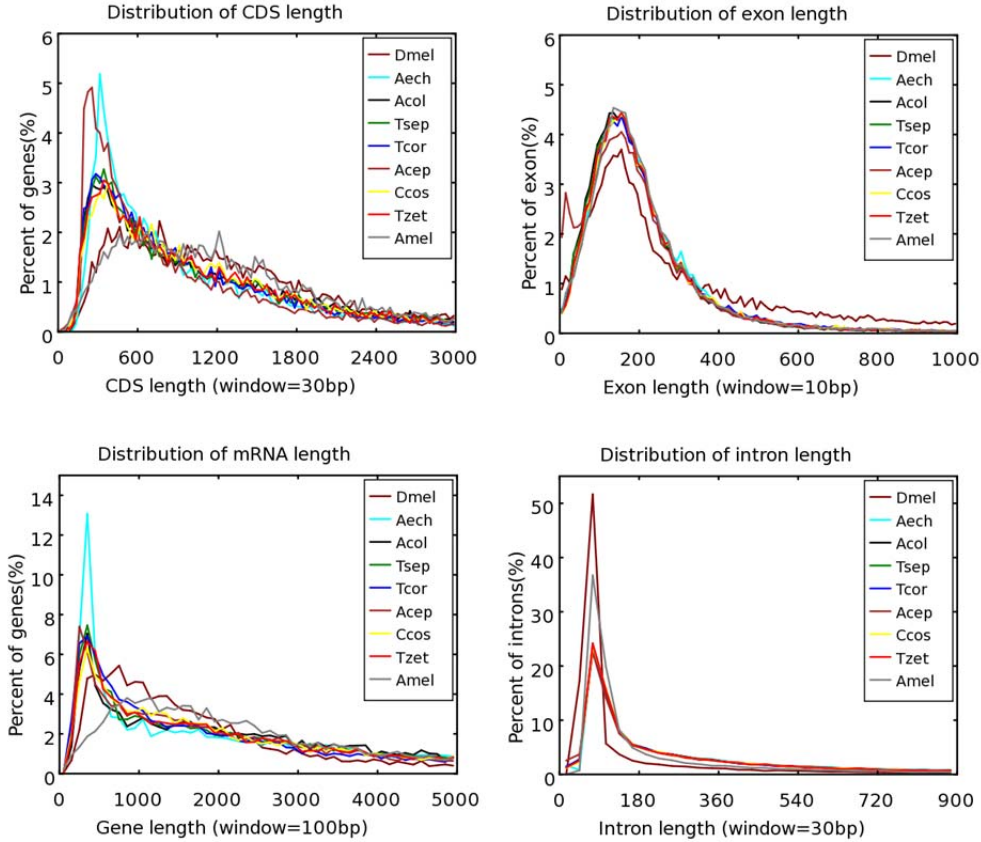

55

### 56 **Supplementary Figure 7. Gene feature distributions**

57 Length distributions for four general features of the final attine ant gene annotation sets: Coding  
 58 sequences (CDS), exons, mRNAs, and introns. The corresponding distributions for *Apis*  
 59 *mellifera* (*Amel*) and *Drosophila melanogaster* (*Dmel*) are included for comparison.

60

61

62

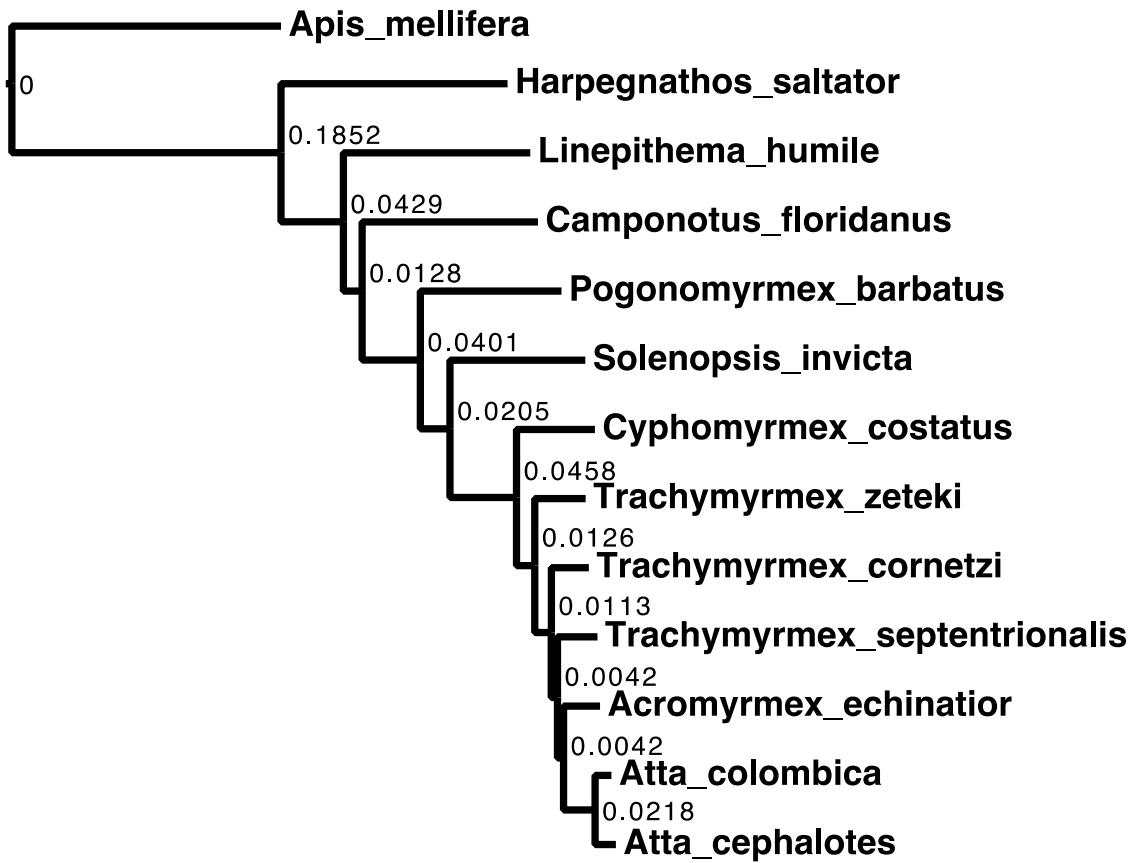

63

—  
0.04

64 **Supplementary Figure 8. Ant maximum-likelihood tree**

65 The most likely tree resulting from a maximum-likelihood analysis of 1,886,151 amino acid sites  
66 (2795 loci parsed into 132 partitions) and 12 ant species and the honey bee *Ap. mellifera* as  
67 outgroup. All nodes were supported by bootstrap frequencies of 1.0. Scale bar and numbers on  
68 nodes indicate branch lengths (substitutions per site).

69

70



71

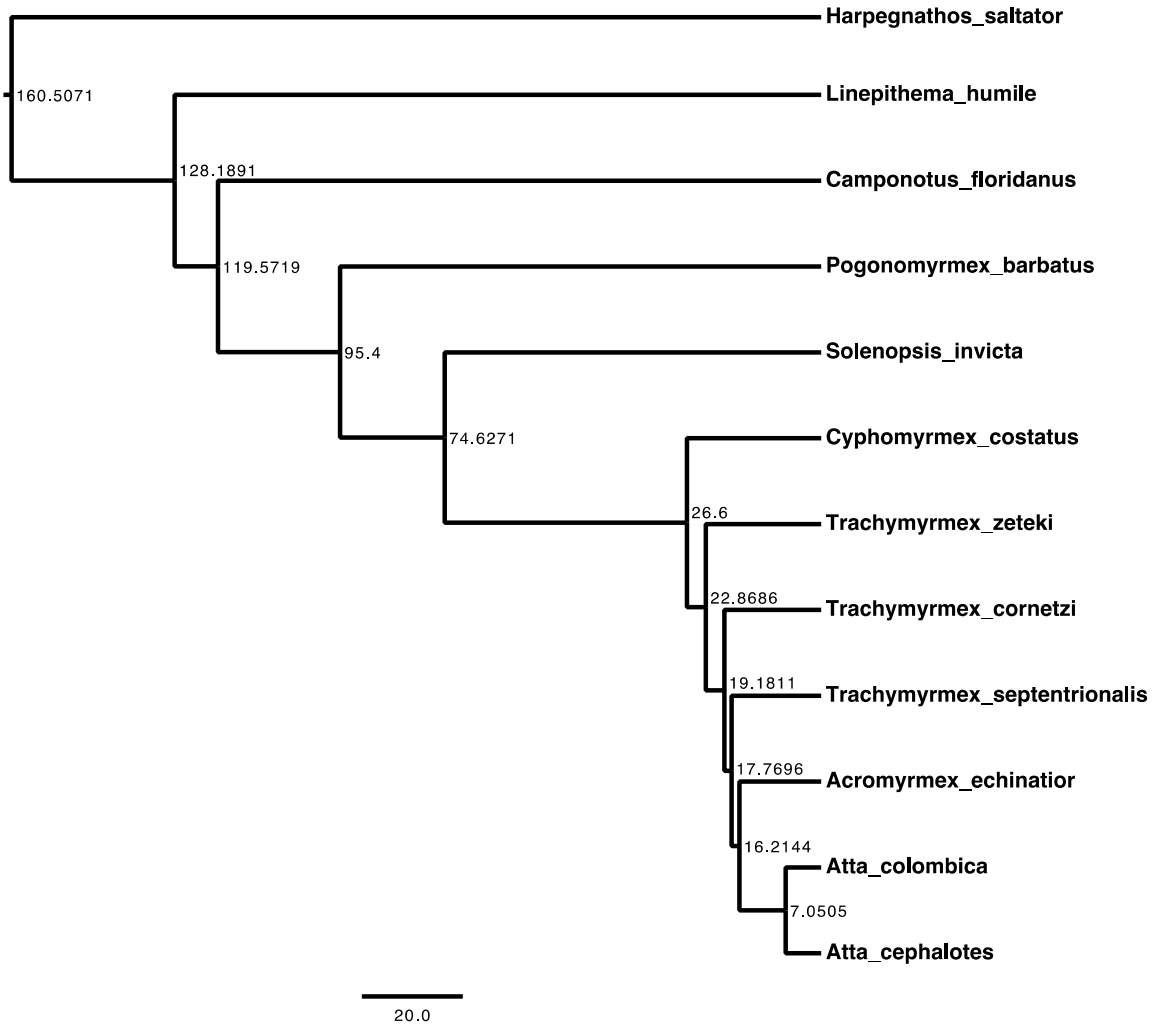

72

73 **Supplementary Figure 9. Ant dated tree**

74 A dated time tree for 12 ant species inferred after using a penalized likelihood approach. Scale  
75 bar and numbers on nodes indicate dates in millions of years before present.

76

77

78

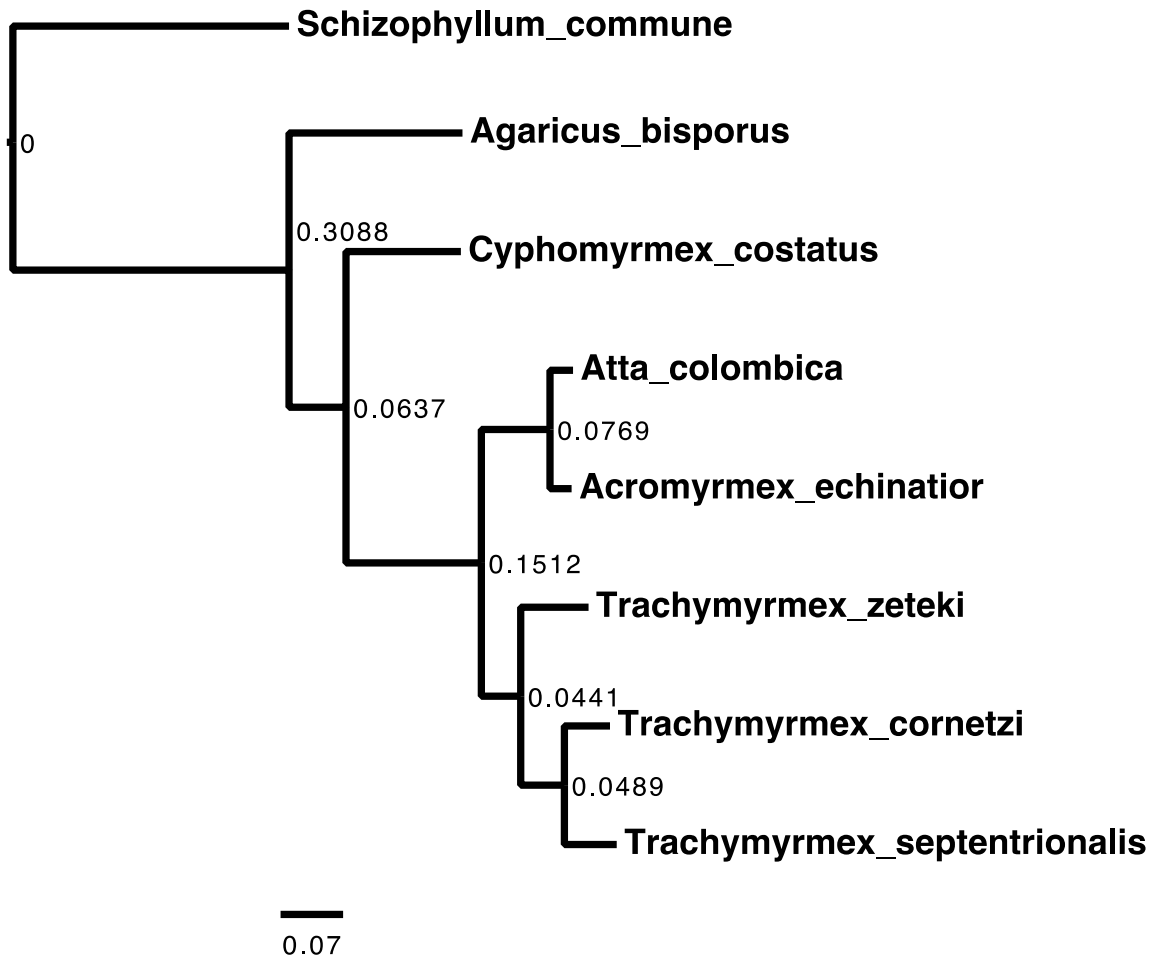

79

80 **Supplementary Figure 10. Cultivar maximum-likelihood tree**

81 The most likely tree resulting from a maximum-likelihood analysis of 825,686 amino acid sites  
82 (1075 loci parsed into 19 partitions) and 8 fungal taxa. All nodes were supported by bootstrap  
83 frequencies of 1.0. Scale bar and numbers on nodes indicate branch lengths (substitutions per  
84 site).

85

86

87

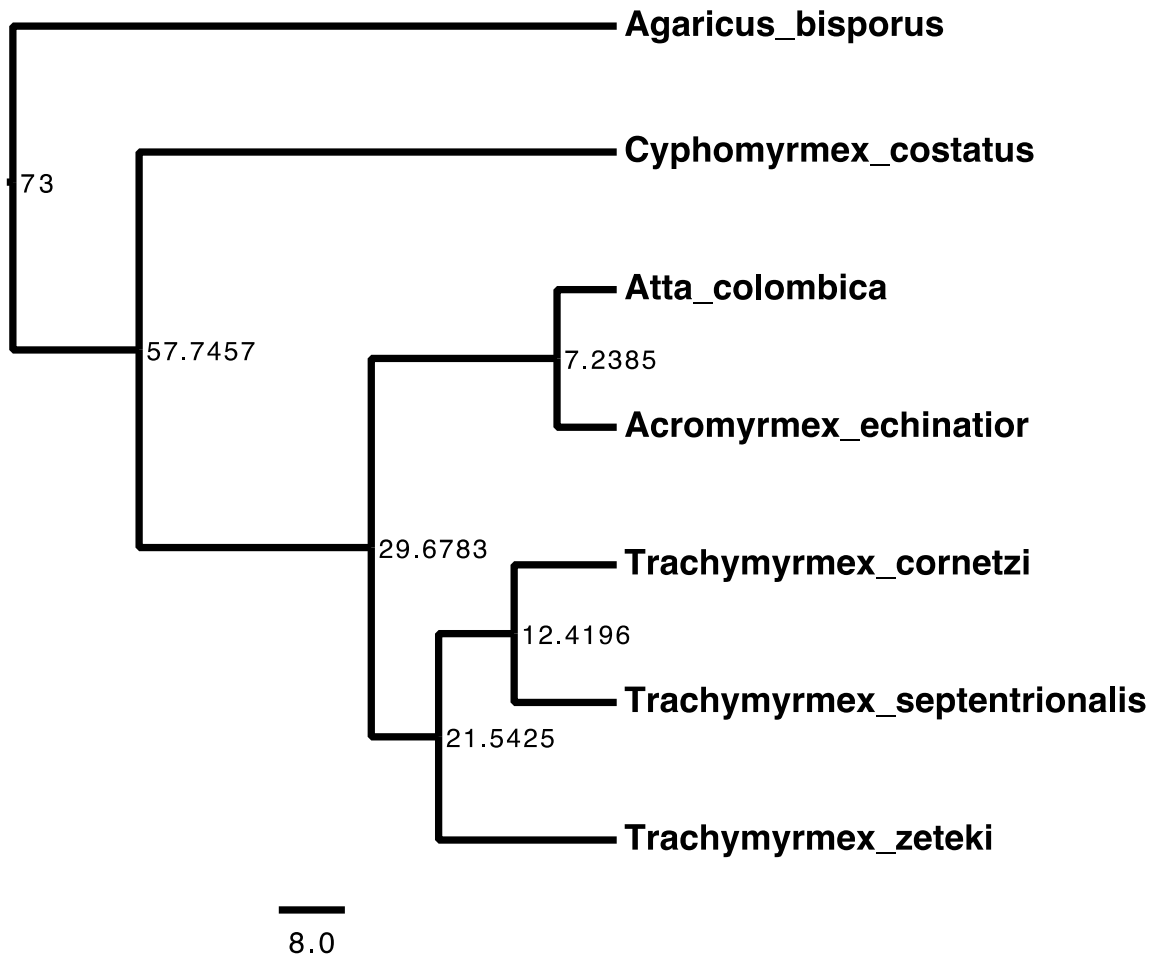

88

89 **Supplementary Figure 11. Cultivar dated tree**

90 A dated time tree for 7 fungal taxa inferred after using a penalized likelihood approach. Scale bar  
91 and numbers on nodes indicate dates in millions of years.

92

93

94  
95

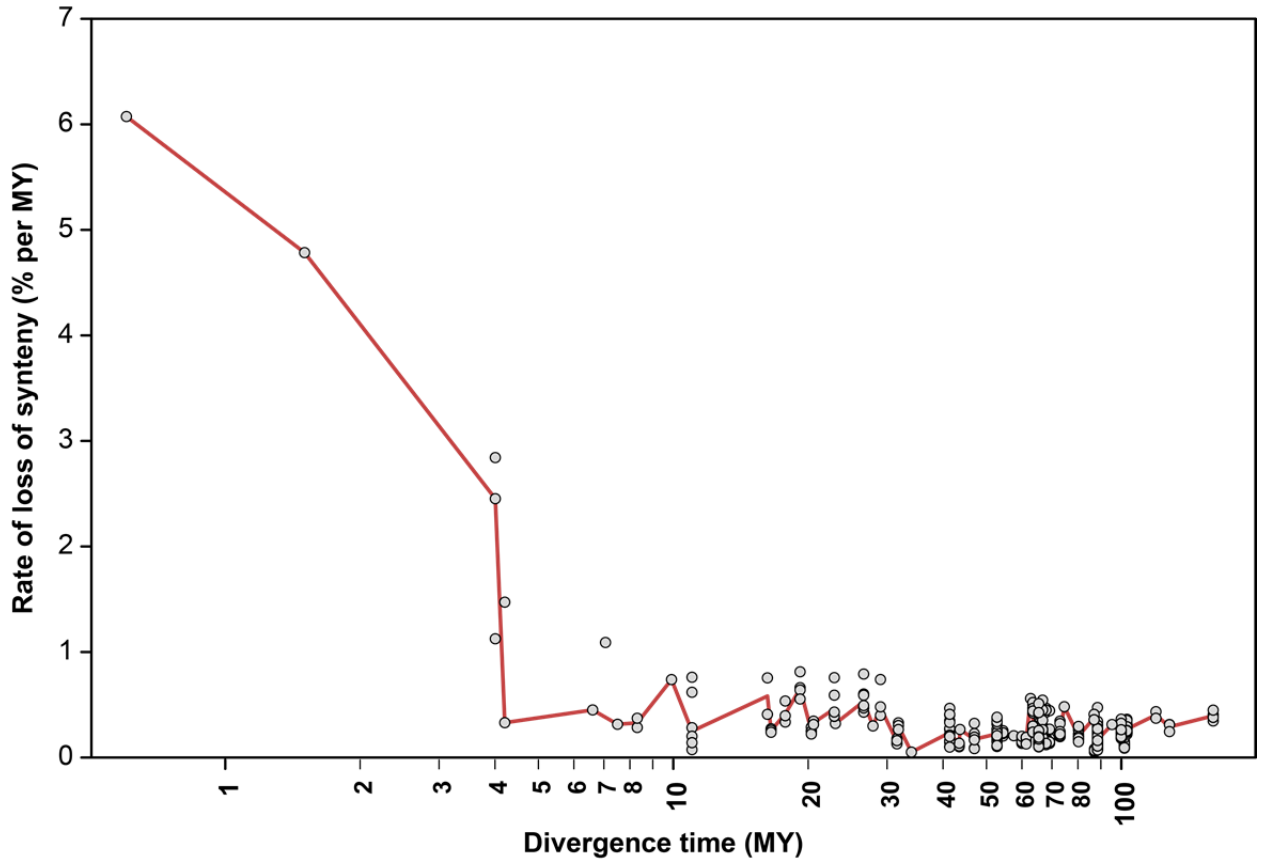

96

97 **Supplementary Figure 12. Synteny loss and divergence time**

98 Relationship between divergence time and rate of loss of synteny for pairs of animal species. The  
99 red line is from a fitted LOWESS robust locally weighted regression (single iteration, local  
100 smoothing width ( $\alpha$ ) = 0.01).

101  
102  
103  
104  
105

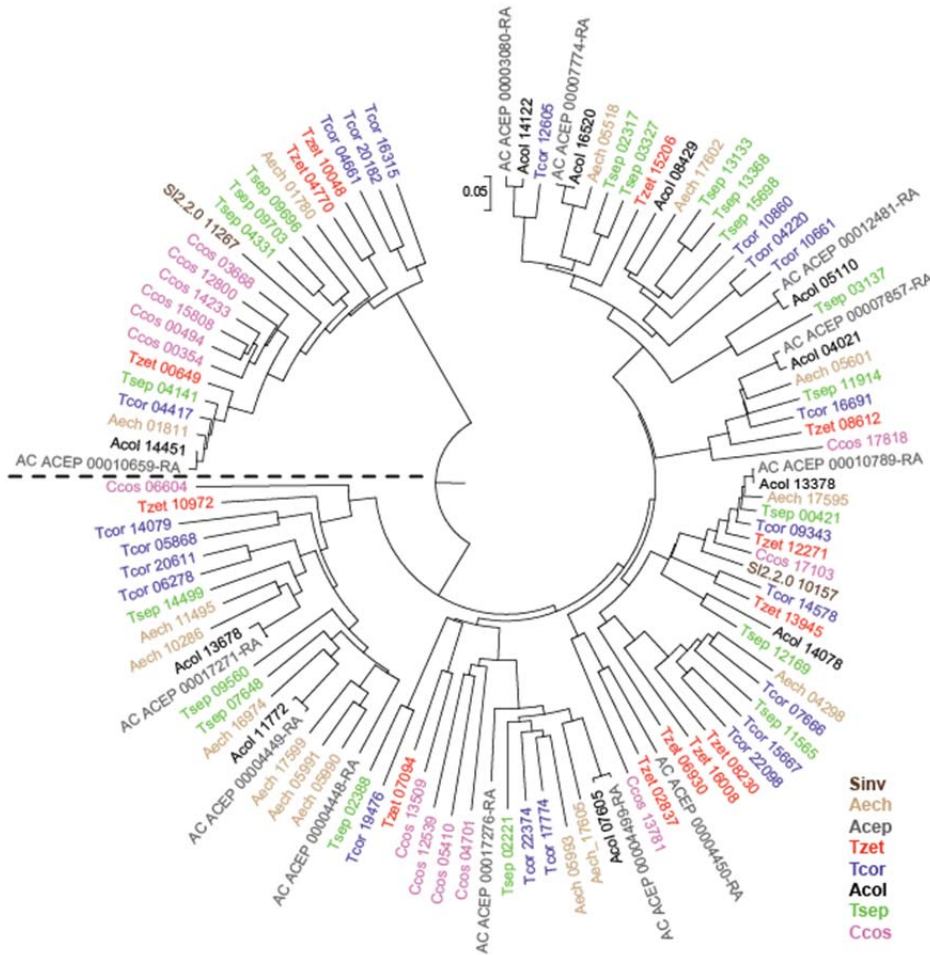

107

108 **Supplementary Figure 13. M16 peptidase phylogenetic tree**

109 M16 peptidase genes across attine ants with *Solenopsis invicta* (Sinv) as outgroup. Genes above  
110 the dashed line are insulin degrading enzymes. The rest belong to the *Nardilysin* gene family,  
111 which is significantly expanded in all attine ants.

112

113

### Consistently decreased gene families

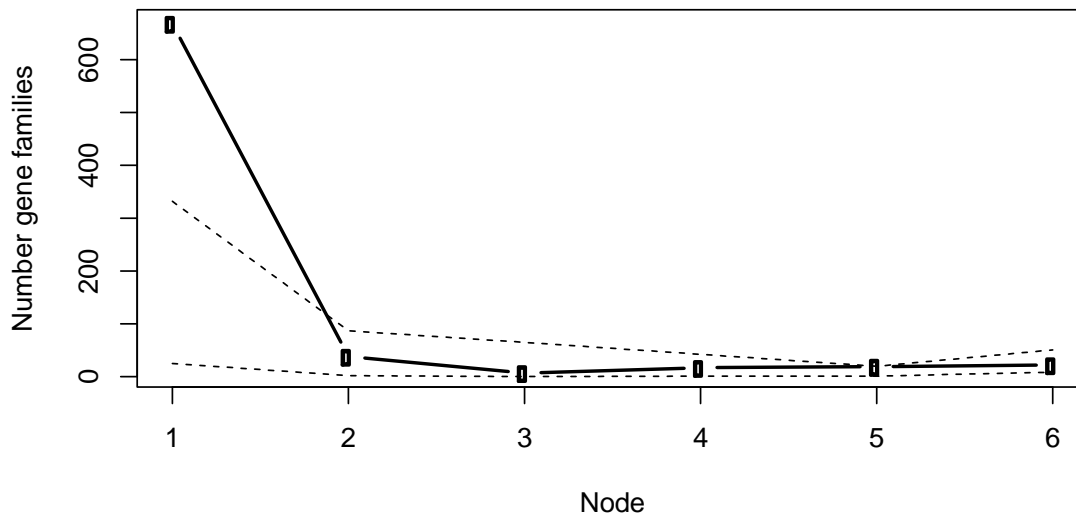

### Consistently increased gene families

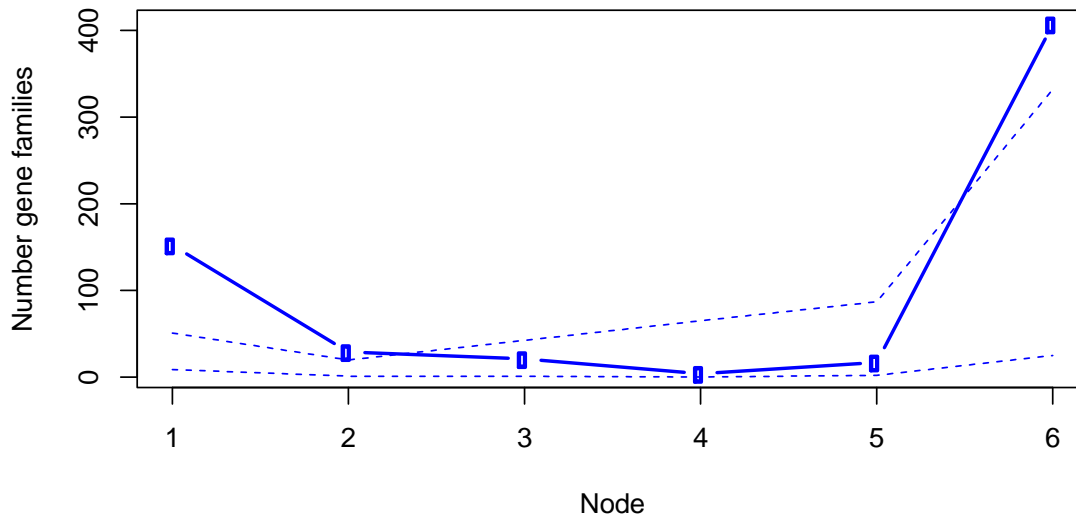

114

#### 115 **Supplementary Figure 14. Gene family decreases and increases**

116 The number of consistently decreased (top, black) and increased (bottom, blue) gene families at  
117 different ancestral branches in the attine ant phylogeny. Dots connected with solid lines indicate  
118 the observed numbers. Dashed lines indicate 5th and 95th percentiles based on permuted data  
119 (see Supplementary methods). Node 1: The immediate ancestor of Ccos. 2: The ancestor of  
120 Tzet. 3: The ancestor of Tcor. 4: The ancestor of Tsep. 5: The ancestor of Aech. 6: The ancestor  
121 of the two *Atta* species.

122

123  
124

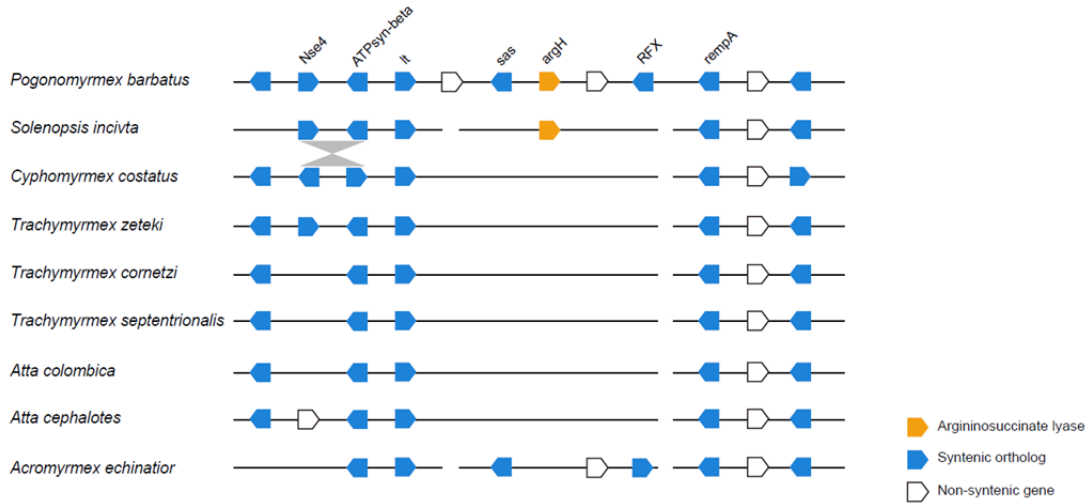

126 **Supplementary Figure 15. Gene synteny around the argininosuccinate lyase gene**  
127 Gene synteny for seven attine and two outgroup ant species. Grey lines between syntenic genes  
128 of *S. invicta* and *C. costatus* denote gene inversions.

129  
130

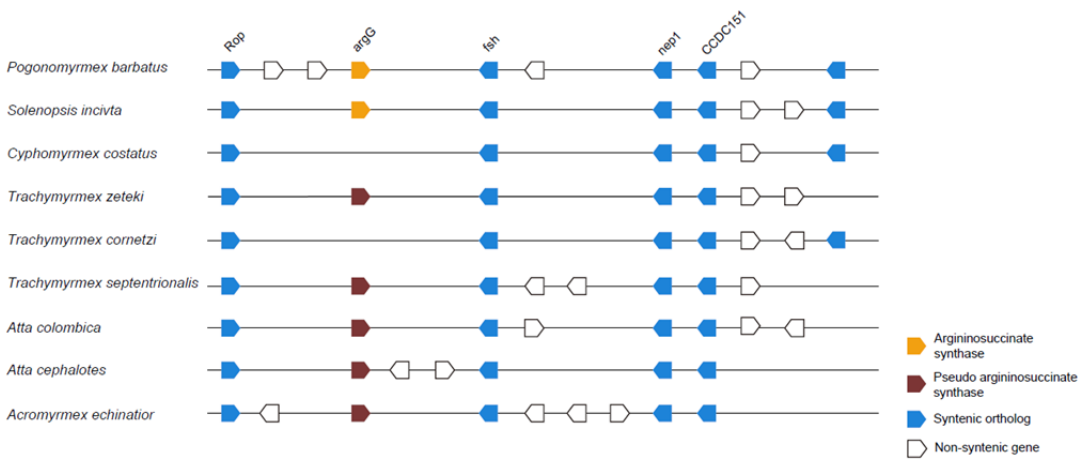

132 **Supplementary Figure 16. Gene synteny around the argininosuccinate synthase gene**  
133 Gene synteny for seven attine and two outgroup ant species.

134

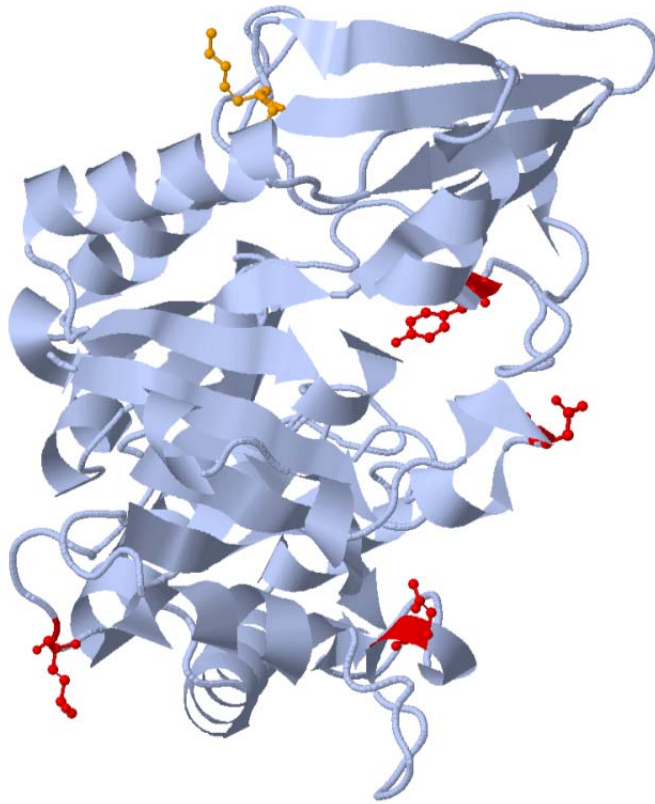

135

Jmol

136 **Supplementary Figure 17. Chitinase protein structure model**

137 Homology-based structure model for the positively selected *At. cephalotes* chitinase. A cartoon  
138 view of the backbone is shown. Residues inferred to be positively selected in the ancestor of all  
139 attine ants are highlighted in red and their side chains shown as ball-and-stick models. A single  
140 additional residue has experienced positive selection in the ancestor of all higher attine ants and  
141 is plotted in orange. Positively selected sites occur primarily on the external surface of the  
142 protein.

143

144



145

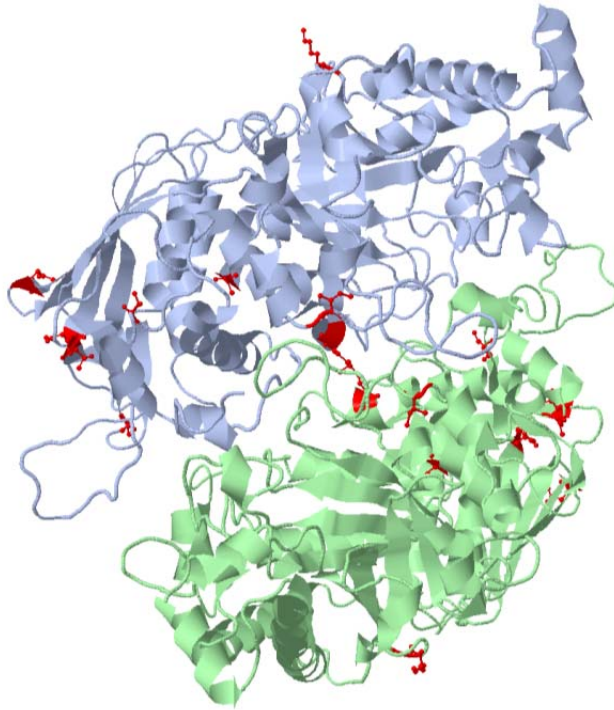

146

Jmol

147 **Supplementary Figure 18. Beta-hexosaminidase protein structure model**

148 Homology-based structure model for the positively selected beta-hexosaminidase enzyme. A  
149 cartoon view of the backbone is shown. Residues inferred to be positively selected in the  
150 ancestor of all attine ants are highlighted in red and their side chains are shown as ball-and-stick  
151 models. Positively selected sites occur primarily on the external surfaces of the proteins.

152

153

154 **Supplementary Tables**  
 155

156 **Supplementary Table 1.** Size, scaffold N50, and depth of coverage for each genome assembly,  
 157 and the total number of filtered bases (Gb) and assembled transcripts for each transcriptome.

| Ant-cultivar combination            |        | Genomes   |          |           | Transcriptomes |              |
|-------------------------------------|--------|-----------|----------|-----------|----------------|--------------|
|                                     |        | Size (Mb) | N50 (Mb) | Depth (×) | Data (Gb)      | #Transcripts |
| <i>Atta colombica</i>               | ant    | 293       | 2.00     | 129       | 4.66           | 32,366       |
|                                     | fungus |           |          |           | 4.99           | 117,446      |
| <i>Acromyrmex echinator</i>         | fungus | 107       | NA       | 45        | 4.56           | 98,389       |
| <i>Trachymyrmex septentrionalis</i> | ant    | 295       | 2.45     | 102       | 5.29           | 31,519       |
|                                     | fungus |           |          |           | 3.18           | 126,024      |
| <i>Trachymyrmex cornetzi</i>        | ant    | 402       | 0.63     | 109       | 4.65           | 37,140       |
|                                     | fungus |           |          |           | 4.49           | 147,902      |
| <i>Trachymyrmex zeteki</i>          | ant    | 269       | 1.33     | 82        | 4.06           | 27,124       |
|                                     | fungus |           |          |           | 4.75           | 167,915      |
| <i>Cyphomyrmex costatus</i>         | ant    | 323       | 1.02     | 92        | 5.00           | 40,166       |
|                                     | fungus | 138       | 0.1      | 27        | 4.44           | 81,243       |

158

159 **Supplementary Table 2.** NCBI BioProject, Genbank, and SRA accession numbers for the data  
 160 generated in this study.

| Data set                     | Species                               | Bioproject  | GenBank      | SRA       |
|------------------------------|---------------------------------------|-------------|--------------|-----------|
| <b>Attine Genomes</b>        | <i>A. colombica</i>                   | PRJNA292624 | LKEW00000000 | SRP070114 |
|                              | <i>T. septentrionalis</i>             | PRJNA292625 | LKEZ00000000 | SRP070115 |
|                              | <i>T. cornetzi</i>                    | PRJNA292627 | LKEY00000000 | SRP070108 |
|                              | <i>T. zeteki</i>                      | PRJNA292628 | LKFA00000000 | SRP070107 |
|                              | <i>C. costatus</i>                    | PRJNA292630 | LKEX00000000 | SRP070116 |
| <b>Attine Transcriptomes</b> | <i>A. colombica</i>                   | PRJNA315800 | -            | SRP072100 |
|                              | <i>T. septentrionalis</i>             | PRJNA315799 | -            | SRP072103 |
|                              | <i>T. cornetzi</i>                    | PRJNA315801 | -            | SRP072099 |
|                              | <i>T. zeteki</i>                      | PRJNA315802 | -            | SRP072098 |
|                              | <i>C. costatus</i>                    | PRJNA315803 | -            | SRP072097 |
| <b>Fungal Genome</b>         | <i>C. costatus</i><br>cultivar        | PRJNA295288 | LSHD00000000 | SRP070118 |
| <b>Fungal Transcriptomes</b> | <i>A. colombica</i><br>cultivar       | PRJNA298477 | GEHH00000000 | SRP065006 |
|                              | <i>A. echinator</i><br>cultivar       | PRJNA298481 | GEHD00000000 | SRP065007 |
|                              | <i>T. septentrionalis</i><br>cultivar | PRJNA298478 | GEHI00000000 | SRP065010 |
|                              | <i>T. cornetzi</i>                    | PRJNA298479 | GEHG00000000 | SRP065009 |

|  |                           |             |              |           |
|--|---------------------------|-------------|--------------|-----------|
|  | cultivar                  |             |              |           |
|  | <i>T. zeteki</i> cultivar | PRJNA298480 | GEHE00000000 | SRP065011 |
|  | <i>C. costatus</i>        | PRJNA299485 | GEHF00000000 | SRP070117 |
|  | cultivar                  |             |              |           |

161

162 **Supplementary Table 3.** Overview of the amount of sequencing data used for the genome  
163 assemblies.

| Species      | Estimated genome size (Mb) | Total raw data(Gb) | Total clean data(Gb) | Sequence coverage (x) | Physical coverage (x) |
|--------------|----------------------------|--------------------|----------------------|-----------------------|-----------------------|
| <b>Ants</b>  |                            |                    |                      |                       |                       |
| Acol         | 280.2                      | 42.30              | 36.23                | 129.29                | 1924.17               |
| Tsep         | 294.4                      | 36.19              | 30.07                | 102.14                | 1668.04               |
| Tcor         | 396.1                      | 54.32              | 43.15                | 108.94                | 1853.61               |
| Tzet         | 294.8                      | 28.87              | 24.13                | 81.88                 | 1032.25               |
| Ccos         | 318.5                      | 34.40              | 29.41                | 92.36                 | 1665.68               |
| <b>Fungi</b> |                            |                    |                      |                       |                       |
| Aech-F       | 107.1                      | 7.14               | 6.29                 | 58.70                 | 199.67                |
| Ccos-F       | 137.8                      | 10.37              | 6.85                 | 49.74                 | 510.16                |

164

165 **Supplementary Table 4.** Ant genome size estimates based on 17-mer analysis. The reads used  
166 for the k-mer analysis were all from small insert size libraries.

| Species     | k-mer | #k-mer         | Peak depth | Genome size |
|-------------|-------|----------------|------------|-------------|
| <b>Acol</b> | 17    | 12,609,581,687 | 45         | 280,212,926 |
| <b>Tsep</b> | 17    | 12,364,256,268 | 42         | 294,387,054 |
| <b>Tcor</b> | 17    | 18,222,575,628 | 46         | 396,142,948 |
| <b>Tzet</b> | 17    | 13,853,424,144 | 47         | 294,753,705 |
| <b>Ccos</b> | 17    | 15,286,050,715 | 48         | 318,459,389 |

167

168

169

170 **Supplementary Table 5.** Fungal cultivar genome size estimates based on 17-mer analysis. The  
171 reads used for k-mer analysis were all from small insert size libraries.

| Species       | K-mer | #K-mer        | Peak depth | Genome size (bp) |
|---------------|-------|---------------|------------|------------------|
| <b>Aech-F</b> | 17    | 4,821,739,644 | 45         | 107,149,769      |
| <b>Ccos-F</b> | 17    | 3,720,481,865 | 27         | 137,795,624      |

172

173

174 **Supplementary Table 6.** Bacterial sequence contamination in the ant genome assemblies as  
 175 determined by sequence homology searches.

| Species     | Total length (bp) | Number of scaffolds |
|-------------|-------------------|---------------------|
| <b>Acol</b> | 0                 | 0                   |
| <b>Tsep</b> | 1,659,586         | 20                  |
| <b>Tcor</b> | 704,151           | 63                  |
| <b>Tzet</b> | 886,119           | 3                   |
| <b>Ccos</b> | 6,706,714         | 393                 |

176  
 177

178 **Supplementary Table 7.** Overall descriptive statistics of the ant and fungal genome assemblies.

|              | Species | Total size (Mb) | Scaffold N50 (bp) | Contig N50 (bp) | Longest scaffold | Longest contig |
|--------------|---------|-----------------|-------------------|-----------------|------------------|----------------|
| <b>Ants</b>  | Acol    | 292.91          | 2,037,154         | 14,996          | 8,263,949        | 117,333        |
|              | Tsep    | 295.39          | 2,447,259         | 14,505          | 10,371,161       | 129,122        |
|              | Tcor    | 402.02          | 632,812           | 12,443          | 7,295,537        | 208,836        |
|              | Tzet    | 269.37          | 1,333,945         | 18,987          | 6,036,021        | 147,902        |
|              | Ccos    | 323.12          | 1,016,465         | 27,202          | 6,852,325        | 271,308        |
| <b>Fungi</b> | Aech-F  | 151.79          | 805               | 717             | 16,265           | 14,331         |
|              | Ccos-F  | 125.81          | 107,067           | 7,342           | 856,993          | 73,276         |

179  
 180  
 181

**Supplementary Table 8.** Genomic repeat content for the five ant- and single fungal genome assemblies. Numbers are percentages of total assembly size.

| Type         | Tzet         | Tcor         | Acol         | Tsep         | Ccos         | Ccos-F      |
|--------------|--------------|--------------|--------------|--------------|--------------|-------------|
| DNA          | 3.42         | 13.31        | 16.69        | 9.27         | 7.83         | 2.95        |
| LINE         | 0.94         | 4.70         | 1.21         | 2.37         | 3.16         | 9.09        |
| SINE         | 0.18         | 0.21         | 0.04         | 0.16         | 0.01         | 0.006       |
| LTR          | 1.15         | 4.95         | 1.60         | 2.08         | 4.89         | 36.7        |
| Satellite    | 1.84         | 2.46         | 2.55         | 1.94         | 2.36         | 0.3         |
| Other        | 0.00         | 0.00         | 0.00         | 0.00         | 0.00         | 0.0001      |
| Unknown      | 20.30        | 19.45        | 8.54         | 10.99        | 15.37        | 0.0006      |
| <b>Total</b> | <b>24.95</b> | <b>42.12</b> | <b>31.76</b> | <b>23.88</b> | <b>33.97</b> | <b>46.4</b> |

182

183 **Supplementary Table 9.** Total sizes of high-frequency repeats (bp) in attine ant genome  
 184 assemblies.

| <b>Repeat family</b> | <b>Acol</b> | <b>Tsep</b> | <b>Tcor</b> | <b>Tzet</b> | <b>Ccos</b> |
|----------------------|-------------|-------------|-------------|-------------|-------------|
| DNA/TcMar-Mariner    | 41,177,317  | 12,412,602  | 16,248,750  | 1,380,383   | 4,650,506   |
| LTR/Gypsy            | 2,043,949   | 2,778,074   | 11,618,114  | 1,472,591   | 8,304,674   |
| LINE/Penelope        | 2,067,910   | 4,348,089   | 9,762,463   | 1,131,558   | 5,448,355   |
| DNA/Maverick         | 3,239,024   | 4,502,365   | 9,705,341   | 1,272,556   | 4,736,121   |
| DNA/En-Spm           | 2,424,258   | 4,396,665   | 5,314,060   | 912,350     | 2,926,260   |
| LTR/Pao              | 922,850     | 1,242,836   | 4,804,113   | 708,988     | 3,735,329   |
| DNA/Sola             | 629,296     | 1,122,453   | 4,166,108   | 529,853     | 2,090,237   |
| LINE/L2              | 513,104     | 660,510     | 3,713,546   | 319,283     | 1,415,312   |
| DNA/TcMar-Tc1        | 1,937,533   | 1,732,123   | 3,640,197   | 1,097,494   | 1,188,501   |
| DNA/TcMar-Marin      | 5,621,351   | 3,824,012   | 3,486,909   | 813,516     | 970,619     |
| LINE/R1              | 282,661     | 489,800     | 2,185,247   | 410,414     | 510,822     |
| DNA/MuDR             | 290,821     | 325,537     | 2,047,337   | 237,155     | 505,544     |
| DNA/P                | 170,577     | 244,993     | 2,035,301   | 433,816     | 834,691     |
| DNA/Harbinger        | 77,359      | 98,444      | 1,954,003   | 309,890     | 671,882     |
| DNA/Helitron         | 251,500     | 314,461     | 1,942,396   | 371,751     | 774,787     |
| LTR/Copia            | 755,428     | 1,593,831   | 1,831,215   | 482,621     | 2,744,775   |

185

186

187 **Supplementary Table 10.** Homology-based gene predictions in attine ant genomes. The  
 188 numbers of predictions/hits generated for each assembly (columns) by each query-genome  
 189 (rows) are given. The number of merged predictions for the two combined ant query-genomes  
 190 are also provided.

|                       |                      | <b>Tzet</b> | <b>Tcor</b> | <b>Acol</b> | <b>Tsep</b> | <b>Ccos</b> |
|-----------------------|----------------------|-------------|-------------|-------------|-------------|-------------|
| <i>H.sapiens</i>      |                      | 3,220       | 4,258       | 3,964       | 4,212       | 4,168       |
| <i>D.melanogaster</i> |                      | 4,951       | 5,015       | 4,813       | 4,987       | 4,986       |
| <i>C.elegans</i>      |                      | 2,647       | 2,774       | 2,618       | 2,662       | 2,726       |
| <i>A.mellifera</i>    |                      | 9,032       | 10,265      | 9,585       | 8,787       | 9,218       |
| <b>ANT1</b>           | <i>H.saltator</i>    | 14,190      | 23,777      | 10,379      | 11,832      | 18,130      |
|                       | <i>C.floridanus</i>  | 14,950      | 27,179      | 11,216      | 12,840      | 20,161      |
|                       | <i>Ac.echinator</i>  | 16,191      | 22,969      | 13,828      | 15,247      | 17,893      |
|                       | <i>Merged</i>        | 21,446      | 39,335      | 16,606      | 19,101      | 27,902      |
| <b>ANT2</b>           | <i>At.cephalotes</i> | 16,783      | 21,180      | 15,290      | 16,471      | 18,028      |
|                       | <i>S.invicta</i>     | 15,635      | 23,325      | 13,473      | 15,685      | 18,399      |
|                       | <i>L.humile</i>      | 13,662      | 16,546      | 12,568      | 13,474      | 14,981      |
|                       | <i>P.barbatus</i>    | 15,211      | 17,974      | 13,911      | 15,324      | 16,422      |
|                       | <i>Merged</i>        | 22,188      | 34,485      | 20,256      | 22,933      | 26,616      |

191

192 **Supplementary Table 11.** Number of *de novo* gene predictions in attine genomes as obtained by  
 193 two different methods, as well as the number of combined predictions.

| <b>Method</b>     | <b>Acol</b> | <b>Tsep</b> | <b>Tcor</b> | <b>Tzet</b> | <b>Ccos</b> |
|-------------------|-------------|-------------|-------------|-------------|-------------|
| AUGUSTUS          | 17,095      | 17,593      | 18,046      | 13,866      | 17,736      |
| SNAP              | 46,818      | 44,545      | 55,952      | 45,419      | 44,461      |
| <b>Merged set</b> | 13,525      | 13,953      | 14,752      | 11,304      | 13,914      |

194

195 **Supplementary Table 12.** Overview of the amounts of RNA-seq data used for ant genome  
 196 annotation.

| <b>Species</b> | <b>Total reads (Mb)</b> | <b>Reads mapped to genome (Mb)</b> | <b>Total bases (Gb)</b> | <b>Bases mapped to genome (Gb)</b> | <b>Number of assembled transcripts</b> |
|----------------|-------------------------|------------------------------------|-------------------------|------------------------------------|----------------------------------------|
| Acol           | 58.68                   | 51.77                              | 5.28                    | 4.66                               | 32,366                                 |
| Tsep           | 64.71                   | 58.77                              | 5.82                    | 5.29                               | 31,519                                 |
| Tcor           | 57.39                   | 51.68                              | 5.17                    | 4.65                               | 37,140                                 |
| Tzet           | 60.03                   | 45.14                              | 5.40                    | 4.06                               | 27,124                                 |
| Ccos           | 60.94                   | 55.52                              | 5.49                    | 5.00                               | 40,166                                 |

197

198

199 **Supplementary Table 13.** Integration of ant gene predictions to generate final gene sets. For  
 200 each species the number of predictions by GLEAN, improved by RNA-seq data, and combined  
 201 are given.

|                       | <b>Acol</b> | <b>Tsep</b> | <b>Tcor</b> | <b>Tzet</b> | <b>Ccos</b> |
|-----------------------|-------------|-------------|-------------|-------------|-------------|
| GLEAN                 | 16,530      | 20,061      | 31,313      | 19,287      | 23,523      |
| Improved by RNA-seq   | 17,515      | 20,764      | 32,498      | 19,839      | 24,933      |
| <b>Final gene set</b> | 14,345      | 15,575      | 19,827      | 15,530      | 16,468      |

202

203 **Supplementary Table 14.** Functional annotation of ant protein coding genes. For each species  
 204 the number of genes annotated by each of four different methods are given, as well as the total  
 205 number of genes with inferred functional annotation.

| <b>Method</b> | <b>Acol</b> | <b>Tsep</b> | <b>Tcor</b> | <b>Tzet</b> | <b>Ccos</b> |
|---------------|-------------|-------------|-------------|-------------|-------------|
| KEGG          | 2,892       | 2,983       | 3,133       | 2,983       | 3,094       |
| IPR           | 8,302       | 8,846       | 10,443      | 9,043       | 10,130      |
| GO            | 6,855       | 7,230       | 8,414       | 7,401       | 8,166       |
| SwissProt     | 8,226       | 8,744       | 9,296       | 8,613       | 9,161       |
| <b>Total</b>  | 8,824       | 9,597       | 11,280      | 9,684       | 10,841      |

206

207 **Supplementary Table 15.** Annotation of four major classes of non-protein-coding genes in  
 208 attine ant genomes. For each species (columns) the number of miRNAs, tRNAs, rRNAs and  
 209 snRNAs (rows) are given.

| <b>RNA class</b> | <b>Acol</b> | <b>Tsep</b> | <b>Tcor</b> | <b>Tzet</b> | <b>Ccos</b> |
|------------------|-------------|-------------|-------------|-------------|-------------|
| miRNA            | 85          | 97          | 400         | 109         | 298         |
| tRNA             | 213         | 466         | 1005        | 518         | 333         |
| rRNA             | 27          | 19          | 125         | 15          | 229         |
| snRNA            | 26          | 44          | 36          | 30          | 37          |

210

211

212 **Supplementary Table 16.** The amount of fungal transcriptome sequencing (RNA-Seq) data  
 213 generated for this study.

| Fungal cultivar | Raw data    |                   | Filtered data |                   |
|-----------------|-------------|-------------------|---------------|-------------------|
|                 | Read length | Base Number (Mbp) | Read length   | Base Number (Mbp) |
| Acol-F          | 90          | 4995              | 80            | 3362              |
| Aech-F          | 90          | 4560              | 80            | 3063              |
| Tcor-F          | 90          | 4490              | 80            | 3121              |
| Tsep-F          | 90          | 3183              | 80            | 1930              |
| Tzet-F          | 90          | 4752              | 80            | 3254              |
| Ccos-F          | 90          | 4443              | 80            | 2281              |

214

215 **Supplementary Table 17.** The number non-redundant genes identified in fungal cultivars.

| Transcriptome | Non-redundant genes# |
|---------------|----------------------|
| Acol-F        | 8360                 |
| Aech-F        | 16180                |
| Tcor-F        | 9003                 |
| Tsep-F        | 8032                 |
| Tzet-F        | 7534                 |
| Ccos-F        | 9023                 |
| Genome        | Genes#               |
| Ccos-F        | 13348                |

216

217

218 **Supplementary Table 18.** The number, total size, and percentage of genomes that are classified  
 219 as segmental duplications (SDs) in the five attine ant genome assemblies. The total numbers of  
 220 genes contained within these SDs are also indicated.

| Segmental duplicates | Acol  | Tsep   | Tcor   | Tzet  | Ccos   |
|----------------------|-------|--------|--------|-------|--------|
| #SDs                 | 4,059 | 11,185 | 20,442 | 5,928 | 10,266 |
| Total length (Mb)    | 6.01  | 10.21  | 17.77  | 6.54  | 13.13  |
| % of genome          | 2.05  | 3.46   | 4.42   | 2.43  | 4.06   |
| #Genes involved      | 178   | 380    | 1107   | 454   | 865    |

221



222 **Supplementary Table 19.** Gene family clustering of ant and insect outgroup gene sets. For each  
 223 species (rows) the total number of genes (#Genes), the number of genes assigned to clusters  
 224 (#Clustered genes), the number of gene clusters (#Clusters), and the number of unclustered genes  
 225 (#Unclustered genes) are given.

| Species                             | #Genes | #Clustered genes | #Clusters | #Unclustered genes |
|-------------------------------------|--------|------------------|-----------|--------------------|
| <b>15 insects</b>                   |        |                  |           |                    |
| <i>Apis mellifera</i>               | 10,660 | 9,701            | 8,610     | 959                |
| <i>Drosophila melanogaster</i>      | 13,689 | 9,973            | 7,429     | 3,716              |
| <i>Nasonia vitripennis</i>          | 17,084 | 14,689           | 8,797     | 2,395              |
| <i>Camponotus floridanus</i>        | 16,356 | 13,046           | 10,751    | 3,310              |
| <i>Harpegnathos saltator</i>        | 17,191 | 13,680           | 10,439    | 3,511              |
| <i>Linepithema humile</i>           | 15,992 | 13,242           | 11,636    | 2,750              |
| <i>Pogonomyrmex barbatus</i>        | 17,015 | 13,593           | 12,118    | 3,422              |
| <i>Solenopsis invicta</i>           | 16,522 | 13,411           | 11,486    | 3,111              |
| <i>Cyphomyrmex costatus</i>         | 16,468 | 15,266           | 12,994    | 1,202              |
| <i>Trachymyrmex zeteki</i>          | 15,530 | 14,552           | 13,206    | 978                |
| <i>Trachymyrmex cornetzi</i>        | 19,827 | 17,608           | 14,429    | 2,219              |
| <i>Trachymyrmex septentrionalis</i> | 15,575 | 14,454           | 13,157    | 1,121              |
| <i>Acromyrmex echinator</i>         | 17,280 | 15,302           | 13,201    | 1,978              |
| <i>Atta colombica</i>               | 14,345 | 13,511           | 12,809    | 834                |
| <i>Atta cephalotes</i>              | 18,021 | 14,810           | 13,211    | 3,211              |

226

227 **Supplementary Table 20.** Genomes used for pairwise synteny calculations.

| Species name                        | Data source                 |
|-------------------------------------|-----------------------------|
| <b>Attine ants</b>                  |                             |
| <i>Atta cephalotes</i>              | Hymenoptera Genome Database |
| <i>Atta colombica</i>               | This study                  |
| <i>Acromyrmex echinator</i>         | Hymenoptera Genome Database |
| <i>Cyphomyrmex costatus</i>         | This study                  |
| <i>Trachymyrmex cornetzi</i>        | This study                  |
| <i>Trachymyrmex septentrionalis</i> | This study                  |
| <i>Trachymyrmex zeteki</i>          | This study                  |
| <b>Published ants</b>               |                             |
| <i>Camponotus floridanus</i>        | Hymenoptera Genome Database |
| <i>Harpegnathos saltator</i>        | Hymenoptera Genome Database |
| <i>Linepithema humile</i>           | Hymenoptera Genome Database |
| <i>Pogonomyrmex barbatus</i>        | Hymenoptera Genome Database |
| <i>Solenopsis invicta</i>           | Hymenoptera Genome Database |

|                                 |                   |
|---------------------------------|-------------------|
| <b><i>Drosophila</i></b>        |                   |
| <i>Drosophila ananassae</i>     | FlyBase           |
| <i>Drosophila erecta</i>        | FlyBase           |
| <i>Drosophila grimshawi</i>     | FlyBase           |
| <i>Drosophila melanogaster</i>  | FlyBase           |
| <i>Drosophila mojavensis</i>    | FlyBase           |
| <i>Drosophila persimilis</i>    | FlyBase           |
| <i>Drosophila pseudoobscura</i> | FlyBase           |
| <i>Drosophila sechellia</i>     | FlyBase           |
| <i>Drosophila simulans</i>      | FlyBase           |
| <i>Drosophila virilis</i>       | FlyBase           |
| <i>Drosophila willistoni</i>    | FlyBase           |
| <i>Drosophila yakuba</i>        | FlyBase           |
| <b>Primates</b>                 |                   |
| <i>Callithrix jacchus</i>       | Ensembl           |
| <i>Gorilla gorilla</i>          | Ensembl           |
| <i>Homo sapiens</i>             | Ensembl           |
| <i>Macaca mulatta</i>           | Ensembl           |
| <i>Nomascus leucogenys</i>      | Ensembl           |
| <i>Otolemur garnettii</i>       | Ensembl           |
| <i>Pan troglodytes</i>          | Ensembl           |
| <i>Pongo abelii</i>             | Ensembl           |
| <b>Birds</b>                    |                   |
| <i>Anas platyrhynchos</i>       | Zhang et al. 2014 |
| <i>Aptenodytes forsteri</i>     | Zhang et al. 2014 |
| <i>Calypte anna</i>             | Zhang et al. 2014 |
| <i>Chaetura pelagica</i>        | Zhang et al. 2014 |
| <i>Charadrius vociferus</i>     | Zhang et al. 2014 |
| <i>Columba livia</i>            | Zhang et al. 2014 |
| <i>Corvus brachyrhynchos</i>    | Zhang et al. 2014 |
| <i>Cuculus canorus</i>          | Zhang et al. 2014 |
| <i>Egretta garzetta</i>         | Zhang et al. 2014 |
| <i>Falco peregrinus</i>         | Zhang et al. 2014 |
| <i>Gallus gallus</i>            | Zhang et al. 2014 |
| <i>Geospiza fortis</i>          | Zhang et al. 2014 |
| <i>Haliaeetus leucocephalus</i> | Zhang et al. 2014 |
| <i>Manacus vitellinus</i>       | Zhang et al. 2014 |
| <i>Meleagris gallopavo</i>      | Zhang et al. 2014 |
| <i>Melospittacus undulatus</i>  | Zhang et al. 2014 |
| <i>Nipponia nippon</i>          | Zhang et al. 2014 |
| <i>Ophithocomus hoazin</i>      | Zhang et al. 2014 |
| <i>Picoides pubescens</i>       | Zhang et al. 2014 |

|                                  |                   |
|----------------------------------|-------------------|
| <i>Pygoscelis adeliae</i>        | Zhang et al. 2014 |
| <i>Struthio camelus</i>          | Zhang et al. 2014 |
| <i>Taeniopygia guttata</i>       | Zhang et al. 2014 |
| <b>Mosquitoes</b>                |                   |
| <i>Anopheles albimanus</i>       | Vectorbase        |
| <i>Anopheles arabiensis</i>      | Vectorbase        |
| <i>Anopheles atroparvus</i>      | Vectorbase        |
| <i>Anopheles dirus</i>           | Vectorbase        |
| <i>Anopheles epiroticus</i>      | Vectorbase        |
| <i>Anopheles farauti</i>         | Vectorbase        |
| <i>Anopheles funestus</i>        | Vectorbase        |
| <i>Anopheles gambiae</i>         | Vectorbase        |
| <i>Anopheles merus</i>           | Vectorbase        |
| <i>Anopheles minimus</i>         | Vectorbase        |
| <i>Anopheles quadriannulatus</i> | Vectorbase        |
| <i>Anopheles stephensi</i>       | Vectorbase        |

228

229 **Supplementary Table 21.** Significantly expanded gene families in all attine ants relative to  
 230 outgroups. The number of genes belonging to each family in each species is given.

| Fam_name          | Acol | Acep | Aech | Tsep | Tcor | Tzet | Ccos | Sinv | Pbar |
|-------------------|------|------|------|------|------|------|------|------|------|
| <b>TOM70</b>      | 5    | 3    | 3    | 2    | 6    | 5    | 7    | 1    | 1    |
| <b>Nardilysin</b> | 10   | 11   | 13   | 15   | 17   | 10   | 8    | 1    | 1    |

231

232 **Supplementary Table 22.** Enriched GO categories among genes with significantly increased  
 233 dN/dS ratios in higher attine ants. P-values are corrected for false discovery rate.

| GO    | P-value   | Description                    |
|-------|-----------|--------------------------------|
| 30286 | 1.1946E-5 | dynein complex                 |
| 15630 | 1.4738E-5 | microtubule cytoskeleton       |
| 5875  | 1.2387E-4 | microtubule associated complex |
| 3824  | 1.4861E-4 | catalytic activity             |
| 7017  | 1.5655E-4 | microtubule-based process      |
| 9987  | 2.7747E-4 | cellular process               |
| 44430 | 2.7747E-4 | cytoskeletal part              |
| 8152  | 2.9687E-4 | metabolic process              |
| 1882  | 5.3706E-4 | nucleoside binding             |
| 30554 | 7.3636E-4 | adenyl nucleotide binding      |
| 1883  | 7.3636E-4 | purine nucleoside binding      |
| 7018  | 1.0849E-3 | microtubule-based movement     |
| 3777  | 1.0849E-3 | microtubule motor activity     |

|       |           |                                                                                       |
|-------|-----------|---------------------------------------------------------------------------------------|
| 44281 | 1.3675E-3 | small molecule metabolic process                                                      |
| 48037 | 1.7441E-3 | cofactor binding                                                                      |
| 166   | 1.7441E-3 | nucleotide binding                                                                    |
| 17076 | 4.3759E-3 | purine nucleotide binding                                                             |
| 50662 | 6.3333E-3 | coenzyme binding                                                                      |
| 3774  | 6.6455E-3 | motor activity                                                                        |
| 9058  | 8.2712E-3 | biosynthetic process                                                                  |
| 6084  | 9.0515E-3 | acetyl-CoA metabolic process                                                          |
| 5524  | 9.0515E-3 | ATP binding                                                                           |
| 32559 | 9.3275E-3 | adenyl ribonucleotide binding                                                         |
| 5856  | 9.3275E-3 | cytoskeleton                                                                          |
| 16887 | 1.1673E-2 | ATPase activity                                                                       |
| 43228 | 1.4319E-2 | non-membrane-bounded organelle                                                        |
| 43232 | 1.4319E-2 | intracellular non-membrane-bounded organelle                                          |
| 9165  | 1.5731E-2 | nucleotide biosynthetic process                                                       |
| 44237 | 1.5731E-2 | cellular metabolic process                                                            |
| 55114 | 1.7678E-2 | oxidation reduction                                                                   |
| 44283 | 1.7678E-2 | small molecule biosynthetic process                                                   |
| 16616 | 1.9354E-2 | oxidoreductase activity, acting on the CH-OH group of donors, NAD or NADP as acceptor |
| 9152  | 2.0174E-2 | purine ribonucleotide biosynthetic process                                            |
| 16491 | 2.2378E-2 | oxidoreductase activity                                                               |
| 34654 | 2.2757E-2 | nucleobase, nucleoside, nucleotide and nucleic acid biosynthetic process              |
| 34404 | 2.2757E-2 | nucleobase, nucleoside and nucleotide biosynthetic process                            |
| 4594  | 2.4554E-2 | pantothenate kinase activity                                                          |
| 6091  | 2.4554E-2 | generation of precursor metabolites and energy                                        |
| 9201  | 2.4554E-2 | ribonucleoside triphosphate biosynthetic process                                      |
| 9206  | 2.4554E-2 | purine ribonucleoside triphosphate biosynthetic process                               |
| 9145  | 2.4554E-2 | purine nucleoside triphosphate biosynthetic process                                   |
| 9142  | 2.4554E-2 | nucleoside triphosphate biosynthetic process                                          |
| 44249 | 2.6560E-2 | cellular biosynthetic process                                                         |
| 32555 | 2.6811E-2 | purine ribonucleotide binding                                                         |
| 32553 | 2.6811E-2 | ribonucleotide binding                                                                |
| 9260  | 2.6811E-2 | ribonucleotide biosynthetic process                                                   |
| 9109  | 2.7395E-2 | coenzyme catabolic process                                                            |
| 6099  | 2.7395E-2 | tricarboxylic acid cycle                                                              |
| 46356 | 2.7395E-2 | acetyl-CoA catabolic process                                                          |

|       |           |                                                                                       |
|-------|-----------|---------------------------------------------------------------------------------------|
| 6732  | 2.7395E-2 | coenzyme metabolic process                                                            |
| 16646 | 3.0484E-2 | oxidoreductase activity, acting on the CH-NH group of donors, NAD or NADP as acceptor |
| 55085 | 3.1248E-2 | transmembrane transport                                                               |
| 51187 | 3.2885E-2 | cofactor catabolic process                                                            |
| 16817 | 3.6329E-2 | hydrolase activity, acting on acid anhydrides                                         |
| 6164  | 3.8278E-2 | purine nucleotide biosynthetic process                                                |
| 5874  | 3.9023E-2 | microtubule                                                                           |
| 50660 | 3.9907E-2 | FAD binding                                                                           |
| 16614 | 4.4839E-2 | oxidoreductase activity, acting on CH-OH group of donors                              |
| 8762  | 4.6860E-2 | UDP-N-acetylmuramate dehydrogenase activity                                           |
| 16668 | 4.6860E-2 | oxidoreductase activity, acting on sulfur group of donors, NAD or NADP as acceptor    |
| 42180 | 4.8928E-2 | cellular ketone metabolic process                                                     |

234

235 **Supplementary Table 23.** Enriched GO categories among genes with significantly increased  
 236 dN/dS ratios in leaf-cutting ants. P-values are corrected for false discovery rate.

| GO    | P-value  | Description                    |
|-------|----------|--------------------------------|
| 30286 | 4.97E-04 | dynein complex                 |
| 5875  | 1.18E-03 | microtubule associated complex |
| 3824  | 5.33E-03 | catalytic activity             |
| 3777  | 9.35E-03 | microtubule motor activity     |
| 15630 | 9.35E-03 | microtubule cytoskeleton       |
| 6402  | 1.07E-02 | mRNA catabolic process         |
| 7018  | 1.31E-02 | microtubule-based movement     |
| 6401  | 1.33E-02 | RNA catabolic process          |
| 3774  | 2.62E-02 | motor activity                 |
| 7017  | 2.62E-02 | microtubule-based process      |
| 44430 | 3.19E-02 | cytoskeletal part              |

237

238

239

240 **Supplementary Table 24.** IPR domains absent in all domesticated higher attine ant cultivars. G  
 241 behind abbreviated species names denotes genomic counts, whereas T denotes transcriptomic  
 242 counts.

| IPR       | Acep-F<br>G | Acol-F<br>T | Aech-F<br>G | Aech-F<br>T | Tcor-F<br>T | Tsep-F<br>T | Tzet-F<br>T | Ccos-F<br>G | Ccos-F<br>T | IPR                                                          |
|-----------|-------------|-------------|-------------|-------------|-------------|-------------|-------------|-------------|-------------|--------------------------------------------------------------|
| IPR001466 | 0           | 0           | 0           | 0           | 0           | 0           | 0           | 6           | 5           | Beta-lactamase-related                                       |
| IPR002196 | 0           | 0           | 0           | 0           | 0           | 0           | 0           | 4           | 2           | Glycoside hydrolase, family 24                               |
| IPR002642 | 0           | 0           | 0           | 0           | 0           | 0           | 0           | 1           | 1           | Lysophospholipase, catalytic domain                          |
| IPR004875 | 0           | 0           | 0           | 0           | 0           | 0           | 0           | 2           | 0           | DDE superfamily endonuclease, CENP-B-like                    |
| IPR005198 | 0           | 0           | 0           | 0           | 0           | 0           | 0           | 2           | 2           | Glycoside hydrolase, family 76                               |
| IPR005269 | 0           | 0           | 0           | 0           | 0           | 0           | 0           | 1           | 1           | Cytokinin riboside 5'-monophosphate phosphoribohydrolase LOG |
| IPR005337 | 0           | 0           | 0           | 0           | 0           | 0           | 0           | 1           | 1           | ATPase, P-loop-containing                                    |
| IPR007541 | 0           | 0           | 0           | 0           | 0           | 0           | 0           | 1           | 1           | Uncharacterised protein family, basic secretory protein      |
| IPR007822 | 0           | 0           | 0           | 0           | 0           | 0           | 0           | 1           | 1           | Lanthionine synthetase C-like                                |
| IPR008564 | 0           | 0           | 0           | 0           | 0           | 0           | 0           | 1           | 1           | Protein of unknown function DUF846, eukaryotic               |
| IPR008906 | 0           | 0           | 0           | 0           | 0           | 0           | 0           | 7           | 2           | HAT dimerisation                                             |
| IPR009297 | 0           | 0           | 0           | 0           | 0           | 0           | 0           | 1           | 1           | Protein of unknown function DUF952                           |
| IPR010435 | 0           | 0           | 0           | 0           | 0           | 0           | 0           | 2           | 2           | Peptidase S8A, DUF1034 C-terminal                            |
| IPR010686 | 0           | 0           | 0           | 0           | 0           | 0           | 0           | 1           | 1           | Protein of unknown function DUF1264                          |
| IPR014870 | 0           | 0           | 0           | 0           | 0           | 0           | 0           | 4           | 4           | Domain of unknown function DUF1793                           |
| IPR018502 | 0           | 0           | 0           | 0           | 0           | 0           | 0           | 1           | 1           | Annexin repeat                                               |
| IPR021851 | 0           | 0           | 0           | 0           | 0           | 0           | 0           | 1           | 1           | Protein of unknown function DUF3455                          |
| IPR023128 | 0           | 0           | 0           | 0           | 0           | 0           | 0           | 1           | 1           | Protein N-terminal glutamine amidohydrolase, alpha beta roll |
| IPR024589 | 0           | 0           | 0           | 0           | 0           | 0           | 0           | 3           | 3           | Fungal ligninase, C-terminal                                 |
| IPR025340 | 0           | 0           | 0           | 0           | 0           | 0           | 0           | 6           | 6           | Protein of unknown function DUF4246                          |

243  
 244

245 **Supplementary Table 25.** Names and accession numbers for the ligninases and surrounding  
 246 genes in the investigated free living and farmed fungal species.

| <b>Fungal species</b>                | <b>Protein</b>             | <b>Accession number</b> |
|--------------------------------------|----------------------------|-------------------------|
| <i>Agaricus bisporus</i>             | Putative membrane permease | XP_006460926            |
|                                      | Ligninase                  | XP_006460927            |
|                                      | DNA Primase                | XP_006460928            |
| <i>Cyphomyrmex costatus symbiont</i> | Putative membrane permease | CCG006738.1             |
|                                      | Ligninase                  | CCG006739.1             |
|                                      | Ligninase                  | CCG006740.1             |
|                                      | Ligninase                  | CCG006741.1             |
|                                      | DNA Primase                | CCG006742.1             |
| <i>Leucoagaricus gongylophorus</i>   | Putative membrane permease | jgiLeugo1875            |
|                                      | DNA Primase                | jgiLeugo1873            |

247

248 **Supplementary Table 26.** Positively selected sites in the attine ant chitinase enzyme.  
 249 Probability refers to posterior probability (BEB) from the Branch Site test of attine sequences  
 250 versus the non-attine outgroups, except for \*, which refers to a test between higher attine ants  
 251 versus the lower attine *C. costatus* and the non-attine outgroups combined. Position refers to the  
 252 site in the *At. cephalotes* sequence. Attines refers to the amino acid in the attines/higher attines.  
 253 Outgroups refers to the corresponding ancestral amino acids.

| <b>Probability</b> | <b>Position</b> | <b>Attines</b> | <b>Outgroups</b> |
|--------------------|-----------------|----------------|------------------|
| 0.987              | 36              | asparagine     | proline          |
| 0.981              | 74              | asparagine     | glutamine        |
| 0.951              | 175             | lysine         | aspartic acid    |
| 0.993              | 297             | tyrosine       | methionine       |
| 0.988*             | 321             | lysine         | arginine         |

254

255 **Supplementary Table 27.** Positively selected sites in the attine ant beta-hexosaminidase. See the  
 256 legend for Supplementary Table 26 for details.

| <b>Probability</b> | <b>Position</b> | <b>Attines</b> | <b>Outgroups</b> |
|--------------------|-----------------|----------------|------------------|
| 0.983              | 26              | threonine      | glutamine        |
| 0.959              | 43              | threonine      | valine           |
| 0.993              | 92              | asparagine     | glycine          |
| 0.980              | 123             | asparagine     | valine           |
| 0.984              | 157             | serine         | asparagine       |
| 0.968              | 201             | alanine        | methionine       |
| 0.983              | 407             | lysine         | alanine          |
| 0.983              | 461             | isoleucine     | lysine           |
| 0.985              | 506             | methionine     | serine           |

257 **Supplementary Table 28.** Sequence IDs for the positively selected chitinase and beta-  
 258 hexosaminidase orthologous groups. Numbers in parenthesis indicate the sequences used for  
 259 calculation of average residue weights and isoelectric points.

| <b>Species</b>                      | <b>Chitinase</b>        | <b>Beta-hexosaminidase</b> |
|-------------------------------------|-------------------------|----------------------------|
| <b>Attines</b>                      |                         |                            |
| <i>Atta cephalotes</i>              | XP_012061787.1 (22-363) | XP_012054348.1 (92-585)    |
| <i>Atta colombica</i>               | Acol_13972 (22-363)     | Acol_09532 (92-585)        |
| <i>Acromyrmex echinator</i>         | XP_011049876.1 (22-363) | XP_011050146.1 (61-554)    |
| <i>Trachymyrmex septentrionalis</i> | Tsep_04708 (23-365)     | Tsep_11452 (92-585)        |
| <i>Trachymyrmex cornetzi</i>        | Tcor_13983 (22-365)     | Tcor_12393 (91-584)        |
| <i>Trachymyrmex zeteki</i>          | Tzet_16480 (1-341)      | Tzet_10233 (61-555)        |
| <i>Cyphomyrmex costatus</i>         | Ccos_09629 (2-343)      | Ccos_12360 (35-528)        |
| <b>Outgroups:</b>                   |                         |                            |
| <i>Solenopsis invicta</i>           | XP_011172553.1 (22-367) | XP_011171734.1 (62-555)    |
| <i>Pogonomyrmex barbatus</i>        | XP_011644658.1 (22-367) | XP_011635262.1 (60-553)    |
| <i>Monomorium pharaonis</i>         | XP_012530946.1 (22-367) | XP_012533480.1 (92-585)    |
| <i>Vollenhovia emeryi</i>           | XP_011861828.1 (23-368) | XP_011862497.1 (92-585)    |
| <i>Wasmannia auropunctata</i>       | XP_011688020.1 (22-367) | XP_011685543.1 (95-588)    |

260  
 261



262 **Supplementary Table 29.** List of primer names and sequences used for ddPCR.

| <b>Oligo name</b> | <b>Sequence</b>                             |
|-------------------|---------------------------------------------|
| Ae635-F1          | 5'-TGCGGTCAGTTGAATCCTAC-3'                  |
| Ae635-R1          | 5'-GTTGAGATCGCCAGCAGTTA-3'                  |
| Ae635-P1          | 5'-AGCCAGACATCTTCCACATGGGCGGTG-3' (FAM/BHQ) |
| Ae4959-F1         | 5'-GGTCATCACGCTGGACTTTA-3'                  |
| Ae4959-R1         | 5'-GCCCTACCATAGAATGGCAC                     |
| Ae4959-P1         | 5'-TCGCCCACGAGCGGAGACAAGCT-3' (FAM/BHQ)     |
| AeRPL18-F1        | 5'-CGTCATCGTCGGTACAATCA-3'                  |
| AeRPL18-R1        | 5'-GTGATGATCTCGCCTCCATT-3'                  |
| AeRPL18-P1        | 5'-TGCGTGCCCGAGCCTTCTCAGTGA-3' (HEX/BHQ)    |
| AeTBP-F1          | 5'-AGGTTTGCGGCTGTTATCAT-3'                  |
| AeTBP-R1          | 5'-TTCTTGCGTACTTTCTGGCA-3'                  |
| AeTBP-P1          | 5'-ACGTGAATCTCCCTCACTCTTGGCGCC-3' (HEX/BHQ) |

263

264

265

266 **Supplementary Methods**

267

268 Overview

269

270 Our sequencing efforts focused on five species of ants and six fungal cultivars: *Atta colombica*  
 271 (*Acol*), *Acromyrmex echinator* (*Aech*), *Trachymyrmex septentrionalis* (*Tsep*), *T. cornetzi* (*Tcor*),  
 272 *T. zeteki* (*Tzet*), and *Cyphomyrmex costatus* (*Ccos*) (Supplementary Table 1). The genome of *Ac.*  
 273 *echinator* has previously been published<sup>1</sup> and the same is true for the genomes of *Atta*  
 274 *cephalotes* (*Acep*)<sup>2</sup> and its cultivar<sup>3</sup>. Accession numbers for the data generated in this study are  
 275 given in Supplementary Table 2. The ant species name abbreviations given in parentheses will be  
 276 used in figures and tables throughout this document, with “-F” appended for their associated  
 277 fungal cultivars.

278

279 Biological material

280

281 Queenright colonies of *C. costatus*, *T. zeteki* and *T. cornetzi* were collected in Gamboa, Panama  
 282 and maintained in the lab on a diet of polenta, oatmeal and bramble leaves at 25 °C and 60 % –  
 283 70 % RH. For *C. costatus* ca. 1200 gynes, males and workers from 15 colonies (*Ccos*006,  
 284 *Ccos*011, 100624-19, 100604-13, 100617-03, 100603-04, 100629-20, 100610-02, 100625-12,  
 285 100611-01, 100610-01, 100618-02, 100624-20, 100611-05, 100611-02) were used for genome  
 286 sequencing, and males, gynes and brood from colony 100610-02 were used for RNA extraction.  
 287 For *T. zeteki* ca. 400 gynes, males and workers from a single colony (*Tzet*028) were used for  
 288 DNA extraction, and workers, males and brood from the same colony were used for RNA

289 extraction. For *T. cornetzi* ca. 400 gynes, workers and males from a single colony (Tcor002)  
290 were used for DNA extraction, and gynes, males, workers and brood form the same colony were  
291 used for RNA extraction. For *T. septentrionalis* ca. 450 males were collected from a single  
292 colony (CR110607-02) from Apalachicola National Forest, Tallahassee, Florida, USA, and  
293 stored in RNAlater at -80 °C for DNA extraction, and gynes, males, workers and brood form the  
294 same colony were used for RNA extraction. For *At. colombica*, a leaf-cutting ant with much  
295 larger reproductives, two males from a single colony (Treedump-2) from Gamboa, Panama, were  
296 collected and used for DNA extractions and gynes, males, workers and brood from the same  
297 colony were used for RNA extractions.

298  
299 Fungal cultures of the cultivar of *C. costatus* (100610-02), *T. zeteki* (Tzet028), *T. cornetzi*  
300 (Tcor002), *Ac. echinator* (Ae372) and *At. colombica* (Treedump-2) were obtained by plating  
301 small tufts of the cultivar on PDYA (Potato Dextrose Yeast-extract Agar) plates containing  
302 streptomycin. After having obtained pure cultures, pieces of mycelium were put on PDYA plates  
303 covered with sterile cellophane disks and incubated for a few months at 25 °C. Mycelium was  
304 collected and used for DNA extraction (only *C. costatus* and *Ac. echinator*) and RNA  
305 extraction. A fungal culture of the cultivar of *T. septentrionalis* was obtained from a colony  
306 (SAR040627-01) collected at Appomattox-Buckingham State Forest, Virginia, USA, by plating  
307 small tufts of the cultivar on PDA (Potato Dextrose Agar) plates containing streptomycin and  
308 penicillin. After having obtained pure cultures, mycelium was propagated in liquid PDA  
309 medium, harvested and stored in RNAlater at -80 °C until RNA extraction.

#### 310 311 DNA and RNA extraction

312  
313 DNA was extracted from ants using the QIAGEN Blood and Cell Culture DNA Mini Kit using the  
314 protocol enclosed in the kit with modifications. Ant tissues were manually disrupted in G2 lysis  
315 buffer using a Teflon pestle. After addition of 1 % proteinase K (20 mg/ml) and 0.2 % RNase A  
316 (QIAGEN, 100 mg/ml), the samples were incubated for 2 – 3 hours at 50 °C on a rotating wheel.  
317 One sample volume of chloroform was added after which samples were incubated for 30 – 60  
318 min at 50 °C and centrifuged for 10 min at 5,000 g, transferred to the Genomic-tip, and  
319 processed according to the protocol.

320  
321 DNA was extracted from ca. 2 g fungal mycelium by grinding the mycelium in liquid nitrogen  
322 with a mortar and pestle. 400 mg ground mycelium was mixed with 5 ml extraction buffer (2 %  
323 CTAB, 1.4 M NaCl, 0.1 M Tris, 20 mM EDTA, 1 % Polyvinylpyrrolidone, pH 8), 50 µl  
324 Proteinase K (20 mg/ml), 50 µl RNase A (100 mg/ml) and 50 µl β-mercaptoethanol and  
325 incubated at 65 °C for 3 hours. Samples were centrifuged for 10 minutes at 3000 g, and the  
326 supernatant transferred to a clean tube. One sample volume of phenol:chloroform:isoamylalcohol  
327 (25:24:1), pH 8 was added, after which the tubes were mixed thoroughly by inversion, incubated  
328 at room temperature for 5 minutes, and centrifuged for 30 minutes at 3,000 g. The upper phase  
329 was transferred to a clean tube and mixed with one sample volume of chloroform:isoamylalcohol  
330 (24:1), mixed by inversion and centrifuged for 10 minutes at 3,000 g. The upper phase was again  
331 transferred to a clean tube and mixed with 1/3 sample volume of 5 M NaCl and 2/3 sample  
332 volume of isopropanol. After careful mixing by inversion, the tubes were centrifuged for 20  
333 minutes at 3,000 g. The supernatant was discarded and the pellet washed with 70 % ethanol.  
334 After a brief centrifugation the supernatant was discarded and the DNA pellet dried at room

335 temperature. The DNA was dissolved in TE buffer over night at 5 °C. The samples were finally  
336 centrifuged for 10 minutes at 15,000 g to pellet any undissolved material, and the supernatant  
337 was transferred to a clean tube.

338  
339 Total RNA was extracted from ant tissue using the QIAGEN RNeasy Mini Kit with modifications.  
340 Ant tissue was disrupted in 500 µl RLC buffer (with 1 % β-mercaptoethanol) in a Fastprep  
341 machine at level 6 for 30 seconds, with 5 mm ceramic beads. One sample volume of  
342 phenol:chloroform:isoamylalcohol (25:24:1), pH 8, was added, and the samples were vortexed  
343 and then centrifuged for 30 minutes at 20,000 g. The upper phase was transferred to a clean tube  
344 and one sample volume of chloroform:isoamylalcohol (24:1) was added, after which the samples  
345 were vortexed and centrifuged for 15 minutes at 20,000 g. The upper phase was transferred to a  
346 clean tube and processed according to the protocol enclosed in the kit.

347  
348 Total RNA was extracted from mycelium cultures using the QIAGEN RNeasy Plant Mini Kit with  
349 the supplied RLC lysis buffer. Disruption of the tissue was accomplished by addition of ca. 100  
350 µl 0.5 mm glass beads before subjecting them to bead beating using a Fastprep machine set at  
351 level 6 for 30 seconds.

#### 352 DNA and RNA sequencing

353  
354  
355 For genome sequencing of the ants, five to six DNA sequencing libraries of different insert sizes  
356 were made for each species. Five libraries (200bp, 500bp, 800bp, 2kb, 5kb) were constructed for  
357 *T. zeteki*, while an additional 10Kb library was constructed for the four other ants. DNA libraries  
358 were also constructed for two fungal symbionts: 200bp and 500bp insert libraries for the cultivar  
359 of *Ac. echinator*, and 200bp, 500bp, 800bp, 2kb, and 5kb insert libraries for the cultivar of *C.*  
360 *costatus*.

361  
362 For the small insert paired-end libraries of 200, 500 and 800 bp, 5 µg of DNA was shattered into  
363 fragments and then end-repaired, A-tailed, and ligated to Illumina paired-end adapters. The  
364 ligated fragments were size selected at 200, 500 or 800 bp on agarose gels and amplified by LM-  
365 PCR to generate the corresponding short insert libraries. For long insert size mate-pair library  
366 construction, 20 - 40 µg of genomic DNA was shattered to the desired insert size using  
367 nebulization for 2 kb or HydroShear (Digilab) for 5 and 10 kb. Then, the DNA fragments were  
368 end-repaired using biotinylated nucleotide analogs (Illumina), and circularized by intramolecular  
369 ligation. Circular DNA molecules were sheared using Adaptive Focused Acoustics (Covaris) to  
370 an average size of 500 bp. Biotinylated fragments were purified on magnetic beads (Invitrogen),  
371 end-repaired, A-tailed, and ligated to Illumina paired-end adapters, size-selected again, and  
372 purified by LM-PCR. The constructed DNA libraries were paired-end sequenced on an Illumina  
373 HiSeq 2000 platform with read lengths of 100 bp for small insert sizes and 49 bp for large insert  
374 sizes.

375  
376 We also constructed a RNA sequencing library for each attine ant and their symbiotic cultivars.  
377 First-strand cDNA was synthesized with random hexamers and Superscript II reverse  
378 transcriptase (Invitrogen). Second strand cDNA was synthesized with *E. coli* DNA PolII  
379 (Invitrogen). Double-stranded cDNA was purified with a Qiaquick PCR purification kit  
380 (QIAGEN) and sheared with a nebulizer (Invitrogen) to 100 to 500 bp fragments. cDNA

381 fragments were end repaired, ligated to 39 dA overhang and Illumina PE adapter oligo mix, then  
382 size selected to 200 bp fragments by agarose gel. After PCR amplification, the libraries were  
383 paired-end sequenced using Illumina HiSeq 2000 with a read length of 90 bp.

384

### 385 Genome assemblies

386

387 Before assembly, we performed filtering to exclude low quality raw reads that met any of the  
388 following criteria: 1)  $\geq 5\%$  Ns or polyA; 2)  $\geq 50$  low-quality bases (Phred score  $\leq 7$ ); 3) adapter  
389 contamination present; 4) paired reads overlapping each other with  $\geq 10$  bp (allowing 10 %  
390 mismatch); 5) PCR duplicates (reads are considered duplicates if read1 and read2 of the same  
391 paired end reads are identical). Low-quality ends were trimmed directly. For small insert size  
392 libraries (200 bp, 500 bp and 800 bp), we also performed an error correction step using the  
393 correction tool released with SOAPdenovo<sup>4</sup>. The statistics for raw and cleaned data are given in  
394 Supplementary Table 3. We also used the cleaned data to estimate the genome sizes of the five  
395 ants and the fungal cultivars of *C. costatus* and *Ac. echinator* using k-mer depth distribution  
396 analysis<sup>4</sup> (Supplementary Figure 1 and Supplementary Figure 2). Based on 17-mer analyses, the  
397 genome sizes of the five attine ants were estimated to be 280 Mb to 396 Mb (Supplementary  
398 Table 4), and the estimated genome sizes of the fungi were 138 Mb and 107 Mb, respectively  
399 (Supplementary Table 5). The k-mer depth distribution of the *Ac. echinator* cultivar showed two  
400 peaks instead of the single peak of a normal near-Poisson distribution, indicating a relatively  
401 high heterozygosity rate in the data, consistent with this fungal cultivar being an allopolyploid<sup>5</sup>.

402

403 After data preprocessing, we used SOAPdenovo (v2.04)<sup>6</sup> to assemble the genomes. We first  
404 constructed contigs based on the short insert libraries (parameters  $-M\ 2\ -d\ 1$ ), then joined the  
405 contigs to scaffolds using paired-end information from all DNA libraries. Unresolved gap  
406 regions were then locally reassembled by GapCloser (released with SOAPdenovo). After  
407 assembly, we used BLAST<sup>7</sup> (E-value cutoff:  $1e-5$ ) to check for contaminant sequences by  
408 blasting the assemblies against the bacterial (for the fungal assembly) or bacterial and fungal (for  
409 ant assemblies) NCBI nt databases. If a scaffold aligned with identity greater than 80% and total  
410 alignment length longer than 50 % of the scaffold length, we considered it a contaminant  
411 sequence and removed it from the assembly after manual confirmation. In the ant assemblies,  
412 some bacterial contamination was found (Supplementary Table 6) but no significant fungal  
413 contamination. In the *C. costatus* cultivar assembly, we found no contaminant sequences.

414

415 Overall statistics of the obtained assemblies after excluding contaminant sequence are given in  
416 Supplementary Table 7. For the *Ac. echinator* cultivar genome both contigs and scaffolds were  
417 very short, presumably due to the heterozygosity problem specified above. As the obtained  
418 assembly was too fragmented for overall analyses, we did not perform repeat or gene annotation  
419 for the *Ac. echinator* cultivar genome.

420

421 Compared to the other ant assemblies, *T. cornetzi* has a relatively large genome and its assembly  
422 has relatively short scaffolds, due to a higher repeat content, as detailed below. GC content  
423 distributions of the assemblies are very similar across the attine ants (Supplementary Figure 3).  
424 Coverage was calculated by mapping the clean short reads back to the assemblies using  
425 SOAPaligner<sup>8</sup>, which produced the sequencing depth distributions given in Supplementary  
426 Figure 4 and Supplementary Figure 5.

427

## 428 Repeat annotation

429

430 Following assembly, repeat content of the ant and fungal cultivar assemblies was annotated using  
431 a combination of several programs. First, tandem repeats were identified using Tandem Repeats  
432 Finder (v4.04, Parameter: Match=2 Mismatch=7 Delta=7 PM=80 PI=10 Minscore=50  
433 MaxPeriod=2000)<sup>9</sup>. Second, transposable elements were identified by combining both  
434 homology-based and *de novo* methods, after identifying known transposable elements in the  
435 genome using RepeatMasker (version 3.2.6)<sup>10</sup> by searching against Repbase (v17.06)<sup>11</sup>. Third,  
436 for *de novo* predictions, we used the programs LTR\_FINDER (v1.0.5, default parameter)<sup>12</sup>,  
437 PILER (v1.0, default parameter)<sup>13</sup>, and RepeatScout (v1.0.5, default parameter)<sup>14</sup> to identify  
438 repeats in the assemblies. The results of these *de novo* predictors were combined into a *de novo*  
439 repeat library, which was then used by RepeatMasker to identify additional high and medium  
440 copy repeats (>10 copies) in the genome assemblies. An overview of the different types of  
441 repeats identified by these methods is given in Supplementary Table 8.

442

443 The largest attine ant genome of *T. cornetzi* has ca. 170 Mb of repetitive content, covering 42 %  
444 of the genome, while the genomes of the four other newly sequenced ants have 67 Mb to 110 Mb  
445 (24-34%) repetitive content. As shown in Supplementary Figure 6 the size of the repetitive  
446 content of all five ants is approximately linearly correlated with the genome sizes. Thus the large  
447 genome size of *T. cornetzi* can be attributed mainly to a high repeat content. The highest-  
448 frequency repeat families of the ant assemblies are listed in Supplementary Table 9, showing that  
449 the expansion of the *T. cornetzi* genome is not merely due to a few dominant repeat families, as  
450 many repeat families appear to be expanded. TcMar-Mariner is the overall largest repeat family  
451 in the attine ants, and *At. colombica* has considerably more TcMar-Mariner sequence (41.2 Mb)  
452 than the other four ant genomes (1.4 - 16.2 Mb).

453

## 454 Annotation of protein-coding genes in ant genomes

455

456 To annotate protein-coding genes in the ant assemblies, we performed both *de novo* and  
457 homology-based predictions, assembled transcripts based on RNA-seq data, and finally  
458 combined the different lines of evidence into a single integrated gene set for each species.

459

460 For homology-based gene predictions, protein sequences from 11 animal species (*Harpegnathos*  
461 *saltator*, *Camponotus floridanus*, *Ac. echinator*, *At. cephalotes*, *Solenopsis invicta*, *Linepithema*  
462 *humile*, *Pogonomyrmex barbatus*, *Apis mellifera*, *Drosophila melanogaster*, *Caenorhabditis*  
463 *elegans*, *Homo sapiens*) were mapped to the genome using TBLASTN (v.2.2.26, parameter: –  
464 e=1e-5)<sup>7</sup>. The alignments were then passed to GeneWise (v2.2.0, default parameters)<sup>15</sup> to  
465 generate gene models, which were then filtered as follows: 1) very short genes (CDS length < 90  
466 bp) were removed; 2) Translated protein sequences of the predicted genes were realigned against  
467 the homologous proteins, and genes with low alignment quality (aligned rate < 0.50, percent  
468 identity < 0.25) were removed; 3) according to the GeneWise output, the processed pseudogenes  
469 were removed.

470

471 We merged the homology-based gene models predicted by the gene sets of *H. saltator*, *Ca.*  
472 *floridanus* and *Ac. echinator* (all of which have been made using the BGI annotation pipeline)

473 into a union gene set (named ANT1), choosing the longest gene model for each locus. The gene  
474 models predicted by the gene sets of *At. cephalotes*, *S. invicta*, *L. humile* and *P. barbatus* (mainly  
475 done using MAKER annotation pipelines) were similarly merged into a union gene set, named  
476 ANT2. Overall statistics of homology-based predictions are given in Supplementary Table 10.

477  
478 *De novo* gene prediction was performed on repeat-masked genomes using the programs  
479 AUGUSTUS (v2.5.5, default parameters)<sup>16</sup> and SNAP (v 2006-07-28, default parameters)<sup>17</sup>. The  
480 appropriate parameters of the obtained gene models were trained with 500 high-quality  
481 homology-based predictions based on the gene set of *Ap. mellifera*. After running the  
482 predictions, additional filtering steps were performed to remove false positives: 1) very short  
483 genes (CDS length <150 bp) were filtered; 2) Genes were removed when predicted to overlap  
484 with two or more homology-based genes predicted with the gene sets of *D. melanogaster* or *Ap.*  
485 *mellifera*.

486  
487 Predictions from AUGUSTUS and SNAP were combined into a single *de novo* set, keeping only  
488 gene models supported by both programs and using the gene delimitations predicted by  
489 AUGUSTUS. The statistics of *de novo* predictions are shown in Supplementary Table 11.

490  
491 RNA-seq data were used to improve annotation. For each ant, we first mapped the RNA-seq  
492 reads onto the assembly with TopHat (v1.3.3, parameter: -I 100000 -r 20 --mate-std-dev 10)<sup>18</sup>  
493 and then assembled transcripts with Cufflinks (v1.2.0, parameter: -I 100000)<sup>19</sup>. Overall statistics  
494 of RNA-seq data are given in Supplementary Table 12.

495  
496 For each ant, the evidence derived from homology-based predictions (*H. sapiens*, *D.*  
497 *melanogaster*, *C. elegans*, *Ap. mellifera*, ANT1 and ANT2) and *de novo* predictions (one *de novo*  
498 gene set) were integrated to generate a consensus gene set by GLEAN<sup>20</sup>. The GLEAN gene set  
499 and the assembled transcripts were then integrated to generate an improved gene set: First, a  
500 Markov model was estimated from the 500 training gene sets used in the *de novo* annotation by  
501 two awk scripts which are included with Geneid gene annotation tools (v1.3)<sup>21</sup>. Second, for the  
502 exon sequences we estimated the transition probability distribution of each nucleotide given the  
503 pentanucleotide preceding it for each of the three possible frames, and an initial probability  
504 matrix from the pentamers observed at each codon position using the awk script  
505 MarkovMatrices.awk. Third, for the intron sequences a single transition matrix was computed as  
506 well as a single initial probability matrix using the awk script MarkovMatrices-noframe.awk.  
507 Fourth, the coding potential of each reading frame in the inferred transcript was computed based  
508 on the Markov model. Transcripts with complete ORFs were picked out and the redundant  
509 isoforms were removed by keeping the longest ORF for each locus. Then these ORFs were  
510 integrated with the GLEAN annotation to replace the incomplete GLEAN gene models.

511  
512 We also performed several filtering steps to refine the gene sets: 1) Removing transposon-related  
513 genes based on functional annotation. 2) Filtering out single-exon genes with length < 400 bp  
514 and no functional annotation (see below) and support from either *D. melanogaster* or *Ac.*  
515 *echinator* homology predictions. 3) Replacing fragmentary gene models with the original ORF  
516 based on Cufflinks transcripts when they overlapped with two or more genes in the integrated  
517 gene set. 4) Replacing fragmentary gene models with homology-based gene models when they  
518 overlapped with two or more genes in the integrated gene set. 5) Removing species-specific

519 genes (based on gene family clustering, see below) that overlapped for > 80 % of repeats or had  
520 no functional annotation or homology support. 6) Adjusting the gene set of *T. cornetzi* that  
521 remained much larger than the other gene sets, because it contained many high-copy-number ( $\geq$   
522 20) genes without functional annotation and RNA-seq read support, by discarding these elements  
523 as being transposon-related.

524

525 The statistics of the final gene sets of the five ants are given in Supplementary Table **13**.

526 Distributions of some general features (CDS length, intron length, etc.) of the final gene sets are  
527 shown in Supplementary Figure **7**.

528

#### 529 Functional annotation of ant protein-coding genes

530

531 Gene functions were predicted based on the best match of the alignments to the SwissProt  
532 database<sup>22</sup> using BLASTP (E-value cutoff 1e-5). The motifs and domains of genes were  
533 determined by InterProScan 4.8<sup>23</sup> against proteins of all databases in InterPro<sup>24</sup>. Gene Ontology<sup>25</sup>  
534 IDs were obtained for each gene from the corresponding InterPro entry. For KEGG annotation<sup>26</sup>,  
535 all genes were aligned against KEGG proteins using the KAAS server<sup>27</sup>, and the pathways in  
536 which each gene might be involved were derived from the best matched protein in KEGG.

537 Overall statistics of functional annotation are listed in Supplementary Table **14**.

538

#### 539 Annotation of ant non-coding RNAs

540

541 Four types of ncRNAs were annotated in our analysis: microRNAs (miRNA), transfer RNAs  
542 (tRNA), ribosomal RNAs (rRNA), and small nuclear RNAs (snRNA). tRNAscan-SE<sup>28</sup> and  
543 INFERNAL<sup>29</sup> were used to predict the ncRNAs in the genome and the tRNA genes were  
544 predicted by tRNAscan-SE with eukaryote parameters. The rRNA fragments were identified by  
545 aligning the rRNA template sequences from invertebrates using BLASTN with E-value cut-off  
546 1e-5. The miRNA and snRNA genes were predicted by searching the Rfam database<sup>30</sup> with  
547 INFERNAL. To accelerate the speed, a rough filtering (discarding the BLAST hits against the  
548 Rfam with E-value > 1) was performed before running INFERNAL. The numbers of predicted  
549 genes are given in Supplementary Table **15**.

550

#### 551 Fungal assemblies and annotation

552

553 The raw Illumina reads were filtered to exclude low quality reads with the following criteria for  
554 raw reads: 1) remove reads with  $\geq$  10% of Ns; 2) remove reads with  $\geq$  40 low-quality bases  
555 (Phred score  $\leq$  7); 3) remove reads with adapter contamination. Also, to avoid GC bias during  
556 read sequencing, we trimmed the first 10 bp of each read. Overall statistics of raw and cleaned  
557 data are given in Supplementary Table **16**.

558

559 The *C. costatus* cultivar genome was annotated using similar methods to those used for the ant  
560 genomes. Several fungal genomes were used as references for homology-based annotation:  
561 *Aspergillus fumigatus*, *Saccharomyces cerevisiae*, *Coprinopsis cinerea*, *Laccaria bicolor*,  
562 *Pleurotus ostreatus*, *Schizophyllum commune* and *Agaricus bisporus*. TBLASTN (v.2.2.26, E-  
563 value cut-off: 1e-5) and GeneWise (v2.2.0, default parameter) were then used for homolog  
564 prediction. *De novo* predictions were done by AUGUSTUS (v2.5.5, default parameter) and

565 SNAP (v 2006-07-28, default parameters) and transcripts were identified by TopHat (v1.3.3,  
566 parameters: -I 100000 -r 20 --mate-std-dev 10) and Cufflinks (v1.2.0, parameters: -I 100000).  
567 Then all evidence was combined by GLEAN as described above for the ant genomes.  
568

569 All clean transcriptome reads were assembled into transcript sequences (Supplementary Table 16  
570 using Trinity<sup>31</sup>, followed by ESTscan<sup>32</sup> and ORF-finder<sup>33</sup> to predict open reading frames within  
571 the assembled transcripts. Shared gene predictions were identified by aligning the predicted  
572 peptide sequences from both methods using BLASTp (E-value cut-off: 1e-5). An open reading  
573 frame identified by ORF-finder was considered reliable if it aligned to the ESTscan prediction  
574 with 100% identity and an alignment length greater than 30% of the gene length for both  
575 predictions. Redundant genes were removed from the gene set. Since some transcripts could be  
576 derived from alternative splicing of the same gene, we performed BLASTp all against all  
577 alignments and kept the longest transcript if two sequences had 100 % identity and an alignment  
578 length > 80 % for both genes, or if one gene was completely contained within another with 100  
579 % identity. The numbers of genes obtained are given in Supplementary Table 17. Functional  
580 annotation of these fungal genes based on either the genome or transcriptome was carried out  
581 using the same method as for the ant gene sets.  
582

#### 583 Attine ant genome segmental duplications

584

585 As *T. cornetzi* had a large genome and gene set, we checked whether this was due to segmental  
586 duplications (SDs) of the genome. To identify SDs, self-alignment for each ant genome was  
587 generated by LASTZ<sup>34</sup> after which alignment blocks with length >1 kb and identity > 80 % were  
588 considered to be SDs. Although *T. cornetzi* has more SDs (17.7 Mb, see Supplementary Table  
589 16) than other ants (6-13 Mb), SDs only make up a small portion of the whole genome (4.42 %),  
590 suggesting that the large genome of *T. cornetzi* is mainly due to an abundance of relatively short  
591 repeat sequences, as described above (see Supplementary Table 18).  
592

#### 593 Ant gene family clustering

594

595 To gain insight into the evolution of gene families of attine ants, we clustered the genes of the  
596 seven attine ants and five other sequenced ant species (*S. invicta*, *P. barbatus*, *Ca. floridanus*, *L.*  
597 *humile* and *H. saltator*) as well as three outgroup insects (*Ap. mellifera*, *D. melanogaster*,  
598 *Nasonia vitripennis*) into gene families using OrthoMCL v2.0.9<sup>35</sup>. To identify homologous  
599 relationships among sequences, they were first aligned using BLASTp with an e-value cutoff of  
600 1e-5 and an alignment length cutoff of 50 % of the gene length. The genes were then clustered  
601 using MCL<sup>36</sup> with the inflation parameter (-I) set at 1.5 based on the BLAST results  
602 (Supplementary Table 19). 2795 families were single-copy in all species and were used for  
603 phylogenetic inference (see below).  
604

#### 605 One-to-one ortholog assignment

606

607 We used reciprocal best BLAST hits to identify one-to-one orthologs between different ants.  
608 First, protein sequences of the seven attine ant species and two outgroup ant species (*S. invicta*  
609 and *P. barbatus*) were used to perform all against all BLASTP, with an E-value cut-off of 1e-5.  
610 Pairwise bi-directional best hits were considered orthologous pairs. Next we iteratively chose a



611 reference species and, for each reference gene, we put paired orthologous genes from other  
612 species together to create an ortholog group. If an ortholog was absent in a given species, we  
613 considered the gene locus missing for that species. Finally, we merged the ortholog groups from  
614 each reference and removed redundant groups, while keeping the orthologous groups that are  
615 present in all species to generate one-to-one orthologous groups. This resulted in 7443 one-to-  
616 one ant ortholog groups (Supplementary Data 2).

617  
618 We used the same method to identify orthologs groups of the symbiotic fungi. Genes of the  
619 cultivars of *At. colombica*, *Ac. echinatifolius*, *T. septentrionalis*, *T. zeteki*, *T. cornetzi* and *C.*  
620 *costatus*, along with genes from *Sc. commune* and *Ag. bisporus* as outgroups, were used to  
621 perform ortholog assignment. Due to the relatively low completeness of transcriptome-based  
622 gene set, we used a looser criterion for creating the transcriptome ortholog groups: at most one  
623 ortholog is absent in 6 transcriptomes, and at least one ortholog is present in the outgroup. This  
624 resulted in 3499 fungal ortholog groups (Supplementary Data 2). Of these, 1075 ortholog groups  
625 were present in a single-copy in all species and were used to build the fungal phylogeny.

### 627 Ant phylogenies

628  
629 We first aligned the protein sequences of 2795 single-copy gene families using MUSCLE<sup>37</sup> with  
630 default parameters and then converted the protein alignments into CDS alignments. The 2795  
631 loci were concatenated in Geneious v7.0<sup>38</sup>, resulting in a data matrix consisting of 1,886,151  
632 amino acid sites and 13 taxa (see Supplementary Figure 8). The concatenated matrix was  
633 analyzed under the parsimony criterion using a heuristic search and 100 random-taxon-addition  
634 replicates in PAUP\*<sup>39</sup>, resulting in a single optimal tree. Using this maximum-parsimony tree as  
635 a reference tree (user\_tree\_topology), and the 2795 loci as the maximum number of possible  
636 partitions, a partitioning analysis was conducted in PartitionFinder<sup>40</sup> in which all possible protein  
637 models were considered and compared (models = all\_protein) under the Bayesian Information  
638 Criterion (BIC) using the hcluster search algorithm, resulting in a scheme consisting of 132  
639 partitions. These partitions and models were employed in a maximum-likelihood analysis in  
640 RAxML 7.7.7<sup>41</sup> with hybrid MPI/Pthreads parallelization<sup>42,43</sup>, resulting in a best tree with the  
641 topology in Supplementary Figure 8, which is identical to the maximum-parsimony topology.  
642 The partitions and models were also employed in maximum-likelihood bootstrap analyses in  
643 RAxML consisting of 1152 pseudoreplicates under the "-b" (thorough search) bootstrap option,  
644 resulting once again in the same topology (Supplementary Figure 8) with bootstrap frequencies  
645 of 1.0 at all nodes.

646  
647 We inferred divergence dates for the maximum-likelihood tree using the penalized likelihood  
648 approach implemented in r8s v.1.7<sup>44</sup>. The bee outgroup *Ap. mellifera* was excluded from the  
649 dating analyses. We calibrated two nodes in our tree with fixed ages based on the results from a  
650 large-scale diversification analysis of the ant subfamily Myrmicinae that employed a total of 27  
651 fossil calibrations across 251 species<sup>45</sup>. The two calibrated nodes in our tree correspond to (1) the  
652 most recent common ancestor (MRCA) of *C. costatus* and its sister group and (2) the MRCA of  
653 *P. barbatus* and its sister group. Three separate analyses were conducted, using the mean, 5%  
654 minimum credibility interval, and 95% maximum credibility interval from Ward et al. 2015<sup>45</sup>,  
655 respectively, to calibrate node 1 (26.6 [19.6, 33.8] MYA) and node 2 (95.4 [85.2,106.0] MYA).  
656 The resulting mean dated tree is given in Supplementary Figure 9.

657  
658  
659  
660  
661  
662  
663  
664  
665  
666  
667  
668  
669  
670  
671  
672  
673  
674  
675  
676  
677  
678  
679  
680  
681  
682  
683  
684  
685  
686  
687  
688  
689  
690  
691  
692  
693  
694  
695  
696  
697  
698  
699  
700  
701  
702

The resulting trees in newick format are:

Ant ML best tree:

```
((Camponotus_floridanus:0.121082,(Pogonomyrmex_barbatus:0.097112,(((Trachymyrmex_zeteki:0.034976,(Trachymyrmex_cornetzi:0.025797,((Acromyrmex_echinator:0.025137,(Atta_colombica:0.01126,Atta_cephalotes:0.014308):0.021758):0.004158,Trachymyrmex_septentrionalis:0.027518):0.004198):0.011349):0.01258,Cyphomyrmex_costatus:0.053898):0.045761,Solenopsis_invicta:0.093097):0.020498):0.040078):0.012843,Linepithema_humile:0.128703):0.042901,Harpegnathos_saltator:0.155939,Apis_mellifera:0.370453);
```

Ant dating, Mean:

```
((Linepithema_humile:128.189089,((((Trachymyrmex_zeteki:22.868618,((((Atta_colombica:7.050499,Atta_cephalotes:7.050499)Atta:9.163937,Acromyrmex_echinator:16.214436)Acro:1.555210,Trachymyrmex_septentrionalis:17.769646)sept:1.411430,Trachymyrmex_cornetzi:19.181076)corn:3.687543)Trachy:3.731382,Cyphomyrmex_costatus:26.600000)Cypho:48.027071,Solenopsis_invicta:74.627071)Solen:20.772929,Pogonomyrmex_barbatus:95.400000)Pogo:24.171940,Camponotus_floridanus:119.571940)Camp:8.617149)Lin:32.318036,Harpegnathos_saltator:160.507124)root;
```

Ant dating, Fixed 5%:

```
((Linepithema_humile:112.555294,((((Trachymyrmex_zeteki:17.170612,((((Atta_colombica:5.598853,Atta_cephalotes:5.598853)Atta:6.969109,Acromyrmex_echinator:12.567962)Acro:1.130312,Trachymyrmex_septentrionalis:13.698274)sept:0.988507,Trachymyrmex_cornetzi:14.686781)corn:2.483831)Trachy:2.429388,Cyphomyrmex_costatus:19.600000)Cypho:45.642977,Solenopsis_invicta:65.242977)Solen:19.957023,Pogonomyrmex_barbatus:85.200000)Pogo:20.115777,Camponotus_floridanus:105.315777)Camp:7.239517)Lin:27.455839,Harpegnathos_saltator:140.011133)root;
```

Ant dating, Fixed 95%:

```
((Linepithema_humile:144.438225,((((Trachymyrmex_zeteki:28.573372,((((Atta_colombica:8.441471,Atta_cephalotes:8.441471)Atta:11.296607,Acromyrmex_echinator:19.738078)Acro:1.981874,Trachymyrmex_septentrionalis:21.719952)sept:1.852024,Trachymyrmex_cornetzi:23.571976)corn:5.001396)Trachy:5.226628,Cyphomyrmex_costatus:33.800000)Cypho:50.484003,Solenopsis_invicta:84.284003)Solen:21.715997,Pogonomyrmex_barbatus:106.000000)Pogo:28.389627,Camponotus_floridanus:134.389627)Camp:10.048598)Lin:37.366406,Harpegnathos_saltator:181.804631)root;
```

703 Fungal phylogenies

704

705 The 1075 loci were concatenated in Geneious v7.0<sup>38</sup>, resulting in a data matrix consisting of  
706 825,686 amino acid sites and 8 taxa. The concatenated matrix was analyzed under the parsimony  
707 criterion using an exhaustive search in the program PAUP\*<sup>39</sup>, resulting in a single optimal tree.  
708 Using this maximum-parsimony tree as a reference tree (user\_tree\_topology), and using the 1075  
709 loci as the maximum number of possible partitions, a partitioning analysis was conducted in  
710 PartitionFinder<sup>40</sup> in which all possible protein models were considered and compared (models =  
711 all\_protein) under the Bayesian Information Criterion (BIC) using the hcluster search algorithm,  
712 resulting in a scheme consisting of 19 partitions. These partitions and models were employed in a  
713 maximum-likelihood analysis in RAxML7.7.7<sup>41</sup> with hybrid MPI/Pthreads parallelization<sup>42,43</sup>,  
714 resulting in a best tree with the topology given in Supplementary Figure 10, which is identical to  
715 the maximum-parsimony optimal topology.

716 The partitions and models were also employed in maximum-likelihood bootstrap analyses in  
717 RAxML consisting of 1152 pseudoreplicates under the "-b" (thorough search) bootstrap option,  
718 resulting once again in the same topology (Supplementary Figure 10) with bootstrap frequencies  
719 of 1.0 at all nodes. We inferred divergence dates for the maximum-likelihood tree using the  
720 penalized likelihood approach implemented in r8s v.1.7<sup>44</sup>. The most distant outgroup taxon  
721 *Schizophyllum commune* was used to root the tree, providing estimates for branch lengths  
722 descended from this root node, and was excluded from the dating analyses. We applied a fixed  
723 age calibration to the node corresponding to the MRCA of the outgroup *Agaricus* and its sister  
724 group using the results from a previous study<sup>46</sup>, a procedure similar to another diversification  
725 date analysis of lepiotaceous attine cultivars<sup>47</sup>. We conducted three separate analyses using  
726 different fixed ages for this node. These fixed ages were obtained from previous age estimates  
727 for this node from Geml et al. 2004<sup>46</sup>. Thus, we conducted analyses using the mean age (73  
728 MYA), the 5% minimum age (55 MYA), and the 95% maximum age (91 MYA) calibrations.  
729 The resulting mean dated tree is given in Supplementary Figure 11.

730

731 The resulting trees in newick format are:

732

733 Fungal ML best tree:

734

735 (Agaricus\_bisporus:0.19387749213730451348,(Cyphomyrmex\_costatus:0.12830919179005234  
736 598,((Atta\_colombica:0.02563147866076995879,Acromyrmex\_echinator:0.0240979591504183  
737 1535):0.07689102429678842943,((Trachymyrmex\_cornetzi:0.05102454243654579863,Trachy  
738 myrmex\_septentrionalis:0.05857574740147841741):0.04889348684938878142,Trachymyrmex\_  
739 zeteki:0.07576027487389550008):0.04405496847347186579):0.15122026564727880649):0.063  
740 73493349384266871,Schizophyllum\_commune:0.61754621855156377475):0.0;

741

742 Fungal dating, Mean:

743

744 (Agaricus\_bisporus:73.000000,(Cyphomyrmex\_costatus:57.745716,((Atta\_colombica:7.238475,  
745 Acromyrmex\_echinator:7.238475)LeafCutter:22.439805,((Trachymyrmex\_cornetzi:12.419644,  
746 Trachymyrmex\_septentrionalis:12.419644)Trachy1:9.122808,Trachymyrmex\_zeteki:21.542452)  
747 Trachy2:8.135828)higher:28.067437)attine:15.254284)root;

748

749 Fungal dating, Fixed 5%:

750

751 (Agaricus\_bisporus:55.000000,(Cyphomyrmex\_costatus:43.526084,((Atta\_colombica:5.464517,  
752 Acromyrmex\_echinatior:5.464517)LeafCutter:16.935270,((Trachymyrmex\_cornetzi:9.384427,T  
753 rachymyrmex\_septentrionalis:9.384427)Trachy1:6.884209,Trachymyrmex\_zeteki:16.268636)Tr  
754 achy2:6.131151)higher:21.126297)attine:11.473916)root;

755

756 Fungal dating, Fixed 95%:

757

758 (Agaricus\_bisporus:91.000000,(Cyphomyrmex\_costatus:71.945059,((Atta\_colombica:9.000823,  
759 Acromyrmex\_echinatior:9.000823)LeafCutter:27.913869,((Trachymyrmex\_cornetzi:15.426005,  
760 Trachymyrmex\_septentrionalis:15.426005)Trachy1:11.349773,Trachymyrmex\_zeteki:26.77577  
761 8)Trachy2:10.138914)higher:35.030367)attine:19.054941)root;

762

763

764 Further details on phylogenetic computations

765

766 PAUP and r8s analyses were carried out on Apple computers with Intel processors; RAxML and  
767 PartitionFinder analyses were carried out on the Smithsonian Hydra supercomputer (Linux-based  
768 with AMD processors).

769 Obtaining natural history data of attine ants and their fungal cultivars

770

771 The natural history data included in Figure 1 were obtained as follows:

772

773 Maximum colony size: Colony sizes in the field vary depending on habitat and colony age, but  
774 can be satisfactorily captured in orders of magnitude of maximal attainable size, as many  
775 previous studies have done as well (see Kooij et al., 2015<sup>5</sup> and contained references).

776

777 Queen insemination status: In a previous study<sup>48</sup> it was shown that three of the attine ant species  
778 included in our study (*C. costatus*, *T. zeteki*, *T. cornetzi*) have exclusively singly mated queens,  
779 whereas two of the leaf-cutting ants (*Ac. echinatior*, *At. colombica*) always have multiply  
780 inseminated queens. Data for the two remaining species were obtained for the present study. We  
781 genotyped ca. 50 workers from six *At. cephalotes* colonies collected in Gamboa, Panama, using  
782 four polymorphic microsatellite markers Atco 13, Atco 15, Atco 37, Atco 47<sup>49</sup> and confirmed  
783 multiple insemination of queens in five of them. For *T. septentrionalis*, we genotyped ca. 10  
784 workers from 10 field colonies made available by Jon Seal, University of Texas at Tyler, using  
785 the polymorphic microsatellite markers Atco 15, Atco 12, Atco 13, Cypho 9-10<sup>49,50</sup>. The results  
786 indicated full-sibling relatedness in eight colonies and established that a few deviating genotypes  
787 in the two remaining colonies were too different to be half-siblings and must therefore have been  
788 drifters from other colonies or indicative of colonies being sometimes headed by more than a  
789 single queen. We therefore listed *At. cephalotes* as having multiply inseminated queens and *T.*  
790 *septentrionalis* as having singly inseminated queens.

791

792 Worker polymorphism: The ancestral state is that ants have morphologically differentiated  
793 queens and a single worker caste<sup>51</sup>, a state that has been maintained in all basal branches of the

794 attine ant phylogeny. For *Ac. echinator* leaf-cutting ants it has been documented that there are  
795 two worker castes: large workers with an approximately normal size distribution, and a small  
796 worker caste with a skewed size distribution including a prolonged right tail that has sometimes  
797 been referred to as “media”<sup>52</sup>. In *Atta* leaf-cutting ants there is an additional soldier caste and  
798 further caste differentiation among the nurses and foragers<sup>51</sup>.

800 Obligate presence of cultivar staphylae: The staphylae (clusters of gongylidia on which higher  
801 attine ants feed) were identified as a specific symbiotic organs of *Atta* and *Trachymyrmex*  
802 cultivars by<sup>53,54</sup> and their consistent production was later confirmed to be a synapomorphy shared  
803 by all cultivars of higher attines and leaf-cutting ants<sup>55</sup>. This inference remains correct today as  
804 no higher attine ants cultivating fungi without staphylae have been found. A recent study did,  
805 however, show that the lower attine ant *Apterostigma megacephala* secondarily acquired a  
806 higher attine symbiont with staphylae<sup>56</sup> and another study showed that the fungal cultivar of one  
807 lower attine ant species (i.e., *Mycocetopus smithii*) occasionally produces staphylae, but with  
808 significantly smaller gongylidia<sup>57</sup>.

809  
810 Ploidy level of cultivar: Details for how these data have been obtained are provided in Kooij et  
811 al. (2015)<sup>5</sup>. Assessment of the degree of polyploidy in the cultivar of *T. septentrionalis* is  
812 ongoing.

#### 813 814 Determining pairwise synteny

815  
816 Pairwise genome synteny was determined among attine ants, among five other sequenced ant  
817 species (*S. invicta*, *P. barbatus*, *Ca. floridanus*, *L. humile* and *H. saltator*), among 12 fruit flies,  
818 eight primates, 22 birds and 16 mosquitoes downloaded from Ensembl database<sup>58</sup>  
819 (Supplementary Table 20).

820  
821 To identify syntenic blocks, orthologous relationships were first identified using BLASTp  
822 searches (e-value cutoff 1e-5) between all species pairs within each phylogenetic group.  
823 Reciprocal best hits (RBH) were considered orthologs. Pairwise syntenic blocks were then  
824 identified based on coordinates of these orthologs as follows: We required each syntenic block to  
825 contain at least five contiguous orthologous genes, and for a block to be extended the gap had to  
826 be smaller than five genes. No more than five gene inversions were allowed in syntenic  
827 blocks between two species.

#### 828 829 830 Rates of loss of synteny

831  
832 The loss of synteny between species pairs was assumed to follow an exponential decay process,  
833 and rates of synteny loss were calculated accordingly as  $1-p_s^{1/T}$ , where  $T$  is divergence time (in  
834 millions of years) and  $p_s$  the estimated proportion synteny between two species. There was some  
835 evidence that rates of synteny loss were higher for species pairs that had diverged very recently  
836 (<5 million years ago; see Supplementary Figure 12). This might be expected for recently-  
837 diverged species, where chromosomal rearrangements may evolve rapidly to reinforce genetic  
838 isolation of species pairs<sup>59</sup>, but it may also result from the way we have defined syntenic blocks  
839 (see above), as the choice of number of orthologous genes and gap sizes is expected to have a

840 greater effect on initial divergence rates. However, there is no reason to suppose that either of  
841 these effects would vary between larger taxonomic groups, and inclusion or exclusion of pairs  
842 with <5 MY divergence gave similar results (see below). Overall differences between taxonomic  
843 groups in their rates of pairwise synteny loss were tested using a Kruskal-Wallis non-parametric  
844 test, and pairs of groups were compared using a Steel-Dwass pairwise post-hoc test.

845  
846 Overall difference in rates of synteny loss between groups were highly significant (Kruskal-  
847 Wallis test,  $H = 104.8$ , d.f. = 5,  $P < 0.0001$ ), and all *post-hoc* pairwise comparisons were also  
848 significant ( $|Z| > 3$ ,  $P < 0.0001$  to  $0.0229$ ) with the exception of those between primates and birds  
849 ( $Z = -2.08$ ,  $P = 0.295$ ), mosquitoes and *Drosophila* ( $Z = -1.26$ ,  $P = 0.808$ ) and mosquitoes and  
850 non-attine ants ( $Z = 2.68$ ,  $P = 0.079$ ). Excluding species pairs with divergence times <5 MY gave  
851 similar results (overall difference:  $H = 101.2$ , d.f. = 5,  $P < 0.0001$ ), but now the difference  
852 between mosquitoes and non-attine ants was also significant ( $Z = 3.11$ ,  $P = 0.023$ ). Calculations  
853 were performed in JMP version 11.2.0.

854  
855 These results confirm earlier findings that amniotes (primates and birds) have reduced rates of  
856 chromosomal rearrangement<sup>60</sup>, but show more variation between insect groups than previously  
857 found<sup>61</sup>.

#### 858 Mapping loss of synteny onto the ant phylogeny

859  
860  
861 Loss of synteny along the branches of the ant phylogeny was estimated by using the FITCH  
862 package in the PHYLIP suite of programs v. 3.695<sup>62</sup>, which reconstructs phylogenies based on  
863 distance matrices, which are assumed to be additive, but does not make assumptions about an  
864 evolutionary clock. The input file was the pairwise loss of synteny between pairs of ant species,  
865 which was treated as a distance matrix and mapped onto the ant phylogeny by using the "U"  
866 option to specify a user-defined tree with branch lengths, derived from the dated phylogeny  
867 based on genome sequences.

868  
869 Mapping rates of synteny divergence onto the ant phylogeny showed that differences in the rates  
870 of synteny loss between attine and non-attine ants were primarily due to high rates of loss of  
871 synteny along the terminal branches in the attine clade.

#### 872 Consistently expanded or contracted gene families

873  
874  
875 We initially used badirate<sup>65</sup> (with -bmodel FR, -rmodel BDI, -ep ML -out, and using the "mean  
876 tree" phylogenetic time estimates as described in 'Phylogenies' above) to estimate the gene birth,  
877 death, and innovation rates in the attine ant gene families (see 'Assemblies and annotation' for  
878 gene family assignment methods). We used gene family counts from the seven attine genomes  
879 and the two outgroups *S. invicta* and *P. barbatus*. However, the resulting rates were inflated and  
880 highly correlated with branch lengths (Pearson's R up to 0.97,  $P < 0.002$ ), likely due to short  
881 ancestral branches and incomplete lineage sorting. We therefore disregarded the rate estimates  
882 themselves and used only the "outlier" gene families that were inferred to evolve at significantly  
883 increased rates. Gene models and family assignments for these candidate outlier families were  
884 manually checked, resulting in the identification of two significantly expanded gene families:  
885 Nardilysin and Tom70, both of which were expanded in all attine ants, see Supplementary Table

886 **21** and Supplementary Figure **13**. Subcellular localization of potentially full length *Ac. echinator*  
887 and *At. colombica* Nardilysin proteins was inferred using the WoLF PSORT web interface  
888 ([www.genscript.com/psort/wolf\\_psort.html](http://www.genscript.com/psort/wolf_psort.html))<sup>66</sup>.  
889

890 To assess overall trends in gene family expansions and contractions, we counted the number of  
891 consistently expanded or contracted gene families at ancestral nodes based on gene family sizes  
892 at the terminal nodes. At each ancestral node, we compared gene family sizes of the ingroup  
893 (speciation after this node) versus outgroups (speciation before this node). For consistent  
894 expansions, we required that the minimum family size of the ingroup be greater than the  
895 maximum family size of the outgroups. The estimates therefore include novel gene families with  
896 0-counts in all outgroups. For consistent gene family contractions we conversely required that  
897 the maximum family size of the ingroup be smaller than the minimum family size of the  
898 outgroups.  
899

900 Since sampling alone could account for some of the observed differences, we sampled all  
901 possible permutations for subsets of two or greater and calculated consistently expanded and  
902 contracted families as described above. Based on these observed distributions the 5th and 95th  
903 percentiles were calculated and compared to the observed data (Supplementary Figure **14**).  
904 Calculations were done in R version 3.0.3<sup>67</sup>.  
905

906 To check whether novel genes (gene families with 0-counts at all ancestral nodes) were derived  
907 *de novo* or could originate from other protein-coding sequences, we used BLASTp of the novel  
908 genes against the NCBI nr database with a relaxed cutoff of 0.1. Genes with no matches to any  
909 metazoan sequence (based on the NCBI Taxonomy classification) were considered likely *de*  
910 *novo* derived. To rule out horizontal gene transfer, these genes were additionally checked with  
911 BLASTp (e-value cutoff 0.01) against NCBI nr sequences of plant, fungal, or bacterial origin.  
912 No matches were found.

### 913 Arginine biosynthesis pathway loss

914  
915 Two genes encoding the argininosuccinate synthase and argininosuccinate lyase enzymes that  
916 are involved in arginine biosynthesis were earlier found lost in the genomes of the evolutionarily  
917 derived leaf-cutting ants *Ac. echinator* and *At. cephalotes*<sup>1,2</sup>. To find out when these two genes  
918 were lost during the evolution of the attine ants, we used the intact CDS sequences from *S.*  
919 *invicta* and *P. barbatus* as references to map to the attine assembly by BLAT (v .35x1, default  
920 parameters)<sup>63</sup>. This showed that the argininosuccinate synthase gene is completely lost in all  
921 attine ants, while the three *Atta* and *Acromyrmex* leaf-cutting ants, *T. septentrionalis* and *T. zeteki*  
922 have retained regions similar to the argininosuccinate lyase gene. To clarify whether these  
923 regions were pseudogenized, we used Genewise (v2.2.0, default parameter)<sup>15</sup> to predict gene  
924 structures from the peptide references of *S. invicta* and *P. barbatus*. This procedure identified  
925 several frame shifts and pre-stop codons in these regions, indicating that all these  
926 argininosuccinate lyase gene regions were pseudogenized.  
927

928 To confirm that these gene loss events were not caused by assembly errors, we checked the gene  
929 synteny of the flanking regions and found that these were intact (Supplementary Figure **15** and  
930 Supplementary Figure **16**). We also aligned the pseudogenized argininosuccinate lyase gene

931 sequences to the *S. invicta* and *P. barbatus* references to establish which mutations were  
932 responsible for the loss of function.  
933

#### 934 dN/dS ratio estimations

935  
936 Sequences of one-to-one orthologous groups of seven attine ants and outgroup ants were used to  
937 generate multiple codon-based alignments by PRANK v.120716<sup>69</sup> using default parameters.  
938 Guidance v1.2<sup>70</sup> was then used for assessing alignment qualities (set "--bootstraps 10" and other  
939 default parameters). We considered aligned codons with Guidance site-wise scores of < 0.5 as  
940 being low-quality sites and marked them as Ns in the alignments for subsequent PAML<sup>71</sup>  
941 analyses.  
942

943 To investigate changes in dN/dS ratios associated with evolutionary transitions in the attine  
944 phylogeny, we used three different models: Model 1 had one dN/dS ratio for the outgroup ants,  
945 and another for all the attine ants (for a total of two dN/dS ratios). Model 2 added an extra dN/dS  
946 ratio for all higher attines (including leaf-cutting ants, for a total of three ratios), while model 3  
947 additionally had a specific dN/dS ratio for leaf-cutting ants only (for a total of 4 dN/dS ratios).  
948 PAML<sup>71</sup> version 4.7 was run twice for each alignment with different start values (Kappa 2.5 or 1,  
949 Omega 0.2 or 2) and non-converging alignments, and those yielding dN/dS estimates >3 were  
950 removed. This resulted in 6057 ortholog alignments. Likelihoods of model 2 versus model 1  
951 (distinct dN/dS ratio for higher attine ants) and of model 3 versus model 2 (distinct dN/dS ratio  
952 for leaf-cutting ants) were then compared with log-ratio tests (LRT). Ortholog alignments where  
953 this test generated significant P-values (FDR-corrected P-value < 0.05), and where dN/dS ratios  
954 were found to increase, were then used for GO analysis in the Cytoscape<sup>72</sup> v.3.1.0 plugin  
955 BinGO<sup>73</sup> v.2.44, using the Hypergeometric test and an FDR-corrected P-value cut-off of 0.05  
956 and the GO annotations of the *At. cephalotes* proteins (Supplementary Table 22 and  
957 Supplementary Table 23).  
958

#### 959 CAZy annotations

960  
961 To identify carbohydrate active enzymes in the fungal cultivars and outgroups downloaded from  
962 the JGI fungal genome database (*Co. cinerea* v1.0, *Ag. bisporus* v2.0, and *Sc. commune* v2.0),  
963 we used the annotated protein sequences to do CAZyme identifications. Putative encoded protein  
964 sequences were first compared to the full length sequences of the CAZy database (v2013)<sup>74</sup> using  
965 BLASTp. Query sequences that produced an e-value < 10<sup>-6</sup> and aligned over their entire length  
966 with a protein in the database with >50% identity were retained and assigned to the same family  
967 as the subject sequence. To make sure these pre-identified protein sequences contained a  
968 functional CAZyme domain, they were then subjected in parallel to (i) a BLAST search against a  
969 library built with partial sequences corresponding to individual Glycoside Hydrolase (GH),  
970 Polysaccharide Lyase (PL), Carbohydrate Esterases (CE), Carbohydrate-Binding Modules  
971 (CBM) and Auxillary Activities (AA) modules with e-value < 0.01, and (ii) a HMMer search<sup>75</sup>  
972 using hidden Markov models custom built for each CAZy module family. A sequence was  
973 considered reliably assigned when it was placed in the same family with the two methods. To  
974 ensure comparability of the data, two sets of CAZy counts were obtained for the *C. costatus*  
975 cultivar: One based on the full annotated genome (similar to the outgroup fungi), and one based



976 on the transcriptome data (similar to the other higher attine cultivars). To categorize CAZy  
977 families according to substrate, we used previously published classifications<sup>76,77</sup>.

978

#### 979 Statistical CAZy analyses

980

981 Clustering of species was done using the R-package pvclust<sup>78</sup> version 1.3-2, using complete  
982 clustering and euclidian distances of normalized CAZy counts (Supplementary Data 1).

983 Statistical significance of *C. costatus* cultivar CAZy transcriptomic counts versus the  
984 domesticated cultivar transcriptomic counts of the higher attine ants and leaf-cutting ants were  
985 assessed using the binomial probability of observing counts equal to or greater than the *C.*  
986 *costatus* count, assuming the sum of all species' counts to be distributed among species with  
987 equal probability and treating the domesticated cultivars as a single group (sum) for the purpose  
988 of the test. All tests were performed in R version 3.0.3<sup>67</sup>.

#### 989 Fungal Interpro domain losses

990

991 Protein Interpro (IPR)<sup>24</sup> annotations of fungal genes were carried out as described in 'Assemblies  
992 and annotation' above. Based on these annotations, domains that were observed in the *C.*  
993 *costatus* cultivar and the *Ag. bisporus* outgroup, but were absent in all domesticated cultivars  
994 were inferred to be lost in the higher attine ant cultivars. To ensure that the absence of an IPR  
995 domains was not due to annotation artefacts, we used HMMER<sup>75</sup> searches with the potentially  
996 lost IPR domain profiles against all transcriptomes as well as the genomic assemblies of the *C.*  
997 *costatus*, *Ac. echinatio*, and *At. cephalotes*<sup>3</sup> cultivars. The genomic and  
998 transcriptomic sequences were first converted to six frame peptide sequences before searching  
999 with HMMER using an e-value of 1e-2 and requiring the length of the match to be greater than  
1000 30% of the domain length. This resulted in 20 reliably lost domains in the higher attine cultivars  
1001 (Supplementary Table 24).

1002

1003 For the ligninase domain, we assessed the synteny of surrounding genes using manual BLAST  
1004 searches against the *Ag. bisporus* (H97 v2.0) and *Leucoagaricus gongylophorus* (Ac12 v1.0)  
1005 genome sequences available at the JGI MycoCosm portal  
1006 ([genome.jgi.doe.gov/programs/fungi/index.jsf](http://genome.jgi.doe.gov/programs/fungi/index.jsf)). The complete DNA primase gene and part of the  
1007 putative membrane permease gene were found on the genomic contig  
1008 gi|482786973|gb|ANIS01002019.1|. The remaining part of the putative membrane permease gene  
1009 was found on the contig gi|482786958|gb|ANIS01002032.1|. The two contigs are non-  
1010 overlapping, but overlapping sequence reads were identified in an independent genome sequence  
1011 of *L. gongylophorus*<sup>79</sup>. Accession numbers for the relevant genes (ligninase domain containing  
1012 and surrounding syntenic genes) are provided in Supplementary Table 25.

1013

#### 1014 Positive selection scans

1015

1016 In order to detect positively selected genes in the ancestor of the leaf-cutting ants, the higher  
1017 non-leaf-cutting attine ants, and all attine ants, we performed PAML (v4.6)<sup>71</sup> analyses.

1018

1019 A total of 7443 multiple alignments of one-to-one ortholog groups of seven attine ants and two  
1020 outgroup ants (*S. invicta*, *P. barbatus*) as described for the dN/dS analysis in section 'dN/dS ratio

1021 estimations' were used for the analysis. We applied the branch-site mode of codeml (model = 2,  
1022 NSsites = 2) for the detection of positively selected genes at the ancestral node of each group.  
1023 Similar methods were used for 3499 single-copy orthologs of the symbiotic fungi and the two  
1024 outgroup fungi *Ag. bisporus* and *Sc. commune*.

1025  
1026 To detect the positively selected sites in ortholog genes, we set the null model (fix\_omega = 1,  
1027 omega = 1) to represent all sites as neutral and the alternative model (fix\_omega = 0, omega =  
1028 1.5) to detect whether there are positively selected sites. These contrasting models were then  
1029 compared using likelihood-ratio tests.

1030  
1031 The P-values of the LRT test were then adjusted by the FDR method. The orthologs were  
1032 considered positively selected if adjusted p-values were smaller than 0.05, and if there was at  
1033 least one site with a Bayes Empirical Bayes (BEB) probability > 0.95. We detected 35, 84, and  
1034 223 genes that were positively selected in the ancestral branch of the leaf-cutting ants, the higher  
1035 attine ants, and all attine ants, respectively. Similar analyses in the fungi identified 97, 290, 622  
1036 and 84 genes that were positively selected in the ancestral lineages of the leaf-cutting ant  
1037 symbionts, the higher attine ant symbionts, all attine ant symbionts, and the *Trachymyrmex*  
1038 symbionts, respectively. Initial analyses of the fungi were run using only *Ag. bisporus* as an  
1039 outgroup for the branch-site tests, but interesting candidate genes were reassessed using both  
1040 outgroups.

1041  
1042 To prevent local optimization of the ML estimates, we ran the PAML estimations with different  
1043 initial initial kappa values of 1.5, 2 and 3, and initial omega values of 1.2, 1.7 and 2. These  
1044 results confirmed the earlier analyses. We also manually checked the alignment quality around  
1045 the positively selected sites to exclude that the significance of the LRT tests were caused by false  
1046 alignments.

1047  
1048 Based on the set of positively selected genes found, we examined those involved in chitin  
1049 metabolism in more detail. For attine ants, these were chitinases and beta-hexosaminidase. For  
1050 fungal cultivars, these were the chitin synthases, which were rechecked after adding the other *S.*  
1051 *commune* outgroup to arrive at our final assessments. The final lists of positively selected genes  
1052 in fungus growing ants and symbiotic cultivars are given in Supplementary Data 2,  
1053 Supplementary Table 26, and Supplementary Table 27.

#### 1054 Identifying protein features

1055  
1056 To identify signal peptides, protein domains, and check the intactness of catalytic sites of ant  
1057 proteins, sequences were analyzed using PROSITE<sup>80</sup> v. 20.114 ([prosite.expasy.org/prosite.html](http://prosite.expasy.org/prosite.html)),  
1058 SMART<sup>81,82</sup> (<http://smart.embl-heidelberg.de>), and NCBI CDD<sup>83</sup>  
1059 ([ncbi.nlm.nih.gov/Structure/cdd/cddsrv.cgi](http://ncbi.nlm.nih.gov/Structure/cdd/cddsrv.cgi)). Searches were done May-June 2015. The predicted  
1060 sequence features were found to be in agreement for all attine ant sequences, except for some  
1061 cases where signal peptides were missing or misclassified as transmembrane regions due to  
1062 ambiguous N-terminal start sites. The loss of the chitin-binding Peritrophin-A domain (CBM\_14,  
1063 PF01607) in the attine chitinases was confirmed by NCBI tblastn of the *S. invicta* protein against  
1064 *At. cephalotes* nucleotide sequences. This confirmed that the GH18 (PF00704) portion of the *S.*  
1065 *invicta* protein aligned well to an *At. cephalotes* mRNA (XM\_012206397.1, 61% identity).

1067 However, the CBM\_14 portion showed only a partial match further downstream in the mRNA,  
1068 and this alignment contained stop-codons and was located in a different reading frame, consistent  
1069 with pseudogenization of this part of the protein.

1070  
1071 Myrmicine ant orthologs of the attine chitinase and beta-hexosaminidase were identified using  
1072 NCBI blastp with attine ant or *S.invicta* sequences as queries. This yielded consistent sequence  
1073 clusters indicating orthologous relationships. Where more than one gene, or more than one  
1074 isoform, existed for a given species, the one with the most similar length to the attine ants was  
1075 chosen. The resulting groups of sequence ids for the two protein clusters are given in  
1076 Supplementary Table **28**.

1077  
1078 Protein Average Residue Weights and Isoelectric Points were calculated using the pepstats  
1079 program from the EMBOSS package<sup>84</sup>, version 6.5.7. To ensure that truncated annotations or  
1080 domain loss of attine ant chitinases did not bias the comparisons, sequences were aligned using  
1081 the T-Coffee<sup>85,86</sup> server (tcoffee.vital-it.ch/apps/tcoffee/index.html, Version\_11.00.8cbe486) and  
1082 unaligned N- and C-terminal regions outside the domains were removed before calculations were  
1083 made. Significance tests were performed using phylogenetic ANOVA as implemented in the R-  
1084 package phytools<sup>87</sup> version 0.4-45 with 10000 simulations, and using the "mean tree"  
1085 phylogenetic time estimates as described in 'Phylogenies' above (including seven attine ants and  
1086 two myrmicine ant outgroups). Data normality and equality of variances were assessed using the  
1087 shapiro.test and var.test functions of R<sup>67</sup> 3.0.3 (2014-03-06).

1088  
1089 Proteins are generally least soluble at a pH that equals their isoelectric point<sup>88</sup> so the observed  
1090 increase in pI can be interpreted as possible adaptations to maintain charge and solubility in an  
1091 environment of increased pH, as found in the foreguts of leaf-cutting ants<sup>89</sup>.

1092  
1093 For the fungal proteins, chitin synthase domain annotations and active sites were checked as  
1094 above. Alignment quality and completeness varied, and positively selected sites were mostly  
1095 outside known domains. Suitable templates for structural modelling were not available,  
1096 precluding further functional inferences from the amino acid changes.

1097  
1098 Protein structure modeling

1099  
1100 Protein modeling was done using SwissModel<sup>90-92</sup> (swissmodel.expasy.org) in both automated  
1101 and alignment mode. Several modeling templates were tried, and the best ones retained:  
1102 3w4r.1.A for the chitinase (QMEAN4 -2.93), 3ozo.1.A for the beta-hexosaminidase (QMEAN4 -  
1103 4.09). The latter template is a homodimer. Though none of the models produced high-scores, the  
1104 overall folding remained consistent and poorly scoring regions were primarily confined to non-  
1105 conserved loop regions that did not contain any of the positively selected sites. Structures were  
1106 visualized using jalview 2.8.2<sup>93</sup> (Supplementary Figure **17** and Supplementary Figure **18**).

1107  
1108 Expression validation - Biological material

1109  
1110 Queenright colonies of *Ac. echinator* were collected in Gamboa, Panama and maintained in the  
1111 lab on a diet of rice and bramble leaves at 25 °C and 60 % – 70 % RH. The following colonies  
1112 were used in the experiment: Ae150, Ae322, Ae356 and Ae372. Large workers were submerged

1113 in liquid nitrogen and divided into head (prosoma), mesosoma (thorax and propodeum) and  
1114 metasoma (gaster and petiole). Five animals were pooled per sample. Labial glands were  
1115 collected by submerging live large workers into ice cold, sterile, phosphate buffered saline  
1116 (PBS). After removing the heads, the mesosoma was opened by pulling the front legs and  
1117 laterocervical plates with forceps, whereafter the two paired labial glands could be collected with  
1118 forceps and immediately placed in an Eppendorf tube on dry ice. The remaining mesosoma  
1119 minus labial glands (fragments of the delicate gland tissue might have remained after dissection)  
1120 was also collected on dry ice. Validations were based on pooled samples of 20 ants each.

1121

#### 1122 Expression validation - RNA extraction and reverse transcription

1123

1124 Total RNA was extracted from ant tissues using the QIAGEN RNeasy Mini Kit with slight  
1125 modifications. Ant tissue was disrupted in 500  $\mu$ l RLT buffer (with 1 %  $\beta$ -mercaptoethanol) in a  
1126 Fastprep machine at level 4 for 45 seconds, with a 1/4 inch ceramic bead. After a brief  
1127 centrifugation to remove foam, samples were transferred to a QIAshredder column and  
1128 centrifuged for 3 minutes at 20.000 g. Samples were then mixed with exactly one sample volume  
1129 of 55 % ethanol, transferred to an RNeasy column and processed according to the manual. RNA  
1130 concentration, integrity and purity were determined using a Nanodrop spectrophotometer  
1131 (Thermo Scientific) and an Experion automated electrophoresis system (Bio-Rad). Total RNA  
1132 was reverse transcribed into cDNA using the iScript cDNA Synthesis Kit (Bio-Rad), after which  
1133 the cDNA was diluted with water to a final concentration corresponding to 5 ng/ $\mu$ l of total RNA.

1134

#### 1135 Expression validation - Droplet digital PCR

1136

1137 Gene expression levels were determined with a QX200 ddPCR system (Bio-Rad) using TaqMan  
1138 probes. The two genes encoding Ribosomal Protein L18 (RPL18) and TATA-Binding Protein  
1139 (TBP), with the Genbank accession numbers XM\_011064584 and XM\_011062766, respectively,  
1140 were used as housekeeping genes to normalize the expression levels across samples. Primers and  
1141 probes were designed using the Primer3Plus<sup>94</sup> and PCR efficiency Calculator<sup>95</sup> web interfaces.  
1142 Primer and probe sequences are presented in Supplementary Table 29. PCR reactions were run  
1143 on a Bio-Rad S1000 Thermal Cycler using the ddPCR Supermix for Probes (Bio-Rad) 1  $\mu$ l of  
1144 template per reaction (although lower amounts had to be used in some cases to obtain a proper  
1145 ratio between positive and negative droplets) and a final concentration of primers and probes of  
1146 0.9  $\mu$ M and 0.25  $\mu$ M, respectively. Each reaction contained primers and probes for one target  
1147 gene and one housekeeping gene, so the different fluorophores of the probes allowed  
1148 discrimination between the PCR products. The PCR program was as follows: 95  $^{\circ}$ C for 10  
1149 minutes, 40 cycles of 94  $^{\circ}$ C for 30 seconds, and 61  $^{\circ}$ C for 60 seconds, followed by 98  $^{\circ}$ C for 10  
1150 minutes. All steps were performed with a ramp rate of 2  $^{\circ}$ C per second. Following PCR, the  
1151 samples were transferred to the ddPCR droplet reader to measure the number of positive and  
1152 negative droplets. Initial data analysis was performed using the QuantaLife software program.

1153

#### 1154 Expression validation - Data analysis

1155

1156 The absolute transcript concentration of each target gene originating from the QuantaLife  
1157 software was normalized through division by the geometric mean of the housekeeping gene  
1158 transcript concentration of the same sample. A pseudocount of 0.08 (corresponding to one

1159 positive droplet in a reaction) was added to all values before taking the base 10 logarithm to  
1160 stabilize the variances. Differences in mean expression levels of each of the two target genes  
1161 among the different tissues were investigated using a one-way ANOVA test followed by a *post*  
1162 *hoc* Tukey HSD test, using a significance level of 0.05 (n = 4). Expression levels were not  
1163 significantly different between mesasoma with or without labial glands, which may indicate that  
1164 other tissues also express these genes.

## 1165 **Supplementary References**

- 1166 1. Nygaard, S. *et al.* The genome of the leaf-cutting ant *Acromyrmex echinatior* suggests key  
1167 adaptations to advanced social life and fungus farming. *Genome Res.* **21**, 1339–1348  
1168 (2011).
- 1169 2. Suen, G. *et al.* The genome sequence of the leaf-cutter ant *Atta cephalotes* reveals insights  
1170 into its obligate symbiotic lifestyle. *PLoS Genet.* **7**, e1002007 (2011).
- 1171 3. Aylward, F. O. *et al.* *Leucoagaricus gongylophorus* produces diverse enzymes for the  
1172 degradation of recalcitrant plant polymers in leaf-cutter ant fungus gardens. *Appl. Environ.*  
1173 *Microbiol.* **79**, 3770–3778 (2013).
- 1174 4. Li, R. *et al.* The sequence and de novo assembly of the giant panda genome. *Nature* **463**,  
1175 311–317 (2010).
- 1176 5. Kooij, P. W., Aanen, D. K., Schiøtt, M. & Boomsma, J. J. Evolutionarily advanced ant  
1177 farmers rear polyploid fungal crops. *J. Evol. Biol.* **28**, 1911–1924 (2015).
- 1178 6. Luo, R. *et al.* SOAPdenovo2: an empirically improved memory-efficient short-read de  
1179 novo assembler. *Gigascience* **1**, 18 (2012).
- 1180 7. Altschul, S. F., Gish, W., Miller, W., Myers, E. W. & Lipman, D. J. Basic Local  
1181 Alignment Search Tool. *J. Mol. Biol.* **215**, 403–410 (1990).
- 1182 8. Li, R. *et al.* SOAP2: An improved ultrafast tool for short read alignment. *Bioinformatics*  
1183 **25**, 1966–1967 (2009).
- 1184 9. Benson, G. Tandem repeats finder: a program to analyze DNA sequences. *Nucleic Acids*  
1185 *Res.* **27**, 573–580 (1999).
- 1186 10. Smit, A. RepeatMasker Open-3.0. <http://www.repeatmasker.org> (2010).
- 1187 11. Jurka, J. *et al.* Repbase Update, a database of eukaryotic repetitive elements. *Cytogenet.*  
1188 *Genome Res.* **110**, 462–467 (2005).
- 1189 12. Xu, Z. & Wang, H. LTR-FINDER: an efficient tool for the prediction of full-length LTR  
1190 retrotransposons. *Nucleic Acids Res.* **35**, 265–268 (2007).
- 1191 13. Edgar, R. C. & Myers, E. W. PILER: identification and classification of genomic repeats.  
1192 *Bioinformatics* **21**, 152–158 (2005).
- 1193 14. Price, A. L., Jones, N. C. & Pevzner, P. A. De novo identification of repeat families in  
1194 large genomes. *Bioinformatics* **21**, i351–i358 (2005).
- 1195 15. Birney, E., Clamp, M. & Durbin, R. GeneWise and Genomewise. *Genome Res.* **14**, 988–  
1196 995 (2004).
- 1197 16. Stanke, M. & Waack, S. Gene prediction with a hidden Markov model and a new intron  
1198 submodel. *Bioinformatics* **19**, ii215–ii225 (2003).
- 1199 17. Korf, I. Gene finding in novel genomes. *BMC Bioinformatics* **5**, 59 (2004).
- 1200 18. Trapnell, C., Pachter, L. & Salzberg, S. L. TopHat: discovering splice junctions with  
1201 RNA-Seq. *Bioinformatics* **25**, 1105–11 (2009).
- 1202 19. Trapnell, C. *et al.* Transcript assembly and quantification by RNA-Seq reveals  
1203 unannotated transcripts and isoform switching during cell differentiation. *Nat. Biotechnol.*

- 1204 **28**, 511–515 (2010).
- 1205 20. Elsik, C. G. *et al.* Creating a honey bee consensus gene set. *Genome Biol.* **8**, R13 (2007).
- 1206 21. Parra, G., Blanco, E. & Guigo, R. GeneID in Drosophila. *Genome Res.* **10**, 511–515
- 1207 (2000).
- 1208 22. Boeckmann, B. The SWISS-PROT protein knowledgebase and its supplement TrEMBL in
- 1209 2003. *Nucleic Acids Res.* **31**, 365–370 (2003).
- 1210 23. Zdobnov, E. M. & Apweiler, R. InterProScan – an integration platform for the signature-
- 1211 recognition methods in InterPro. *Bioinformatics* **17**, 847–848 (2001).
- 1212 24. Mulder, N. J. *et al.* InterPro: an integrated documentation resource for protein families,
- 1213 domains and functional sites. *Brief. Bioinform.* **3**, 225–235 (2002).
- 1214 25. Harris, M. A. *et al.* The Gene Ontology (GO) database and informatics resource. *Nucleic*
- 1215 *Acids Res.* **32**, D258–D261 (2004).
- 1216 26. Kanehisa, M. & Goto, S. KEGG: Kyoto Encyclopaedia of Genes and Genomes. *Nucl.*
- 1217 *Acids Res.* **28**, 27–30 (2000).
- 1218 27. Moriya, Y., Itoh, M., Okuda, S., Yoshizawa, A. C. & Kanehisa, M. KAAS: an automatic
- 1219 genome annotation and pathway reconstruction server. *Nucleic Acids Res.* **35**, W182–
- 1220 W185 (2007).
- 1221 28. Lowe, T. M. & Eddy, S. R. tRNAscan-SE: a program for improved detection of transfer
- 1222 RNA genes in genomic sequence. *Nucleic Acids Res.* **25**, 955–964 (1997).
- 1223 29. Nawrocki, E. P., Kolbe, D. L. & Eddy, S. R. Infernal 1.0: inference of RNA alignments.
- 1224 *Bioinformatics* **25**, 1335–1337 (2009).
- 1225 30. Griffiths-Jones, S., Bateman, A., Marshall, M., Khanna, A. & Eddy, S. R. Rfam: An RNA
- 1226 family database. *Nucleic Acids Res.* **31**, 439–441 (2003).
- 1227 31. Grabherr, M. G. *et al.* Full-length transcriptome assembly from RNA-Seq data without a
- 1228 reference genome. *Nat. Biotechnol.* **29**, 644–652 (2011).
- 1229 32. Iseli, C., Jongeneel, C. V & Bucher, P. ESTScan: a program for detecting, evaluating, and
- 1230 reconstructing potential coding regions in EST sequences. *Proc. Int. Conf. Intell. Syst.*
- 1231 *Mol. Biol.* 138–148 (1999).
- 1232 33. Rombel, I. T., Sykes, K. F., Rayner, S. & Johnston, S. A. ORF-FINDER: A vector for
- 1233 high-throughput gene identification. *Gene* **282**, 33–41 (2002).
- 1234 34. Harris, R. Improved pairwise alignment of genomic DNA. *Penn. State Univ.* (2007).
- 1235 35. Li, L., Stoeckert, C. J. & Roos, D. S. OrthoMCL: identification of ortholog groups for
- 1236 eukaryotic genomes. *Genome Res.* **13**, 2178–2189 (2003).
- 1237 36. Enright, A. J., Van Dongen, S. & Ouzounis, C. A. An efficient algorithm for large-scale
- 1238 detection of protein families. *Nucleic Acids Res.* **30**, 1575–1584 (2002).
- 1239 37. Edgar, R. C. MUSCLE: multiple sequence alignment with high accuracy and high
- 1240 throughput. *Nucleic Acids Res.* **32**, 1792–1797 (2004).
- 1241 38. Kearse, M. *et al.* Geneious Basic: an integrated and extendable desktop software platform
- 1242 for the organization and analysis of sequence data. *Bioinformatics* **28**, 1647–1649 (2012).
- 1243 39. Swofford, D. L. PAUP\*: Phylogenetic Analysis Using Parsimony (\*and Other Methods).
- 1244 <http://paup.csit.fsu.edu/> (2002).
- 1245 40. Lanfear, R., Calcott, B., Ho, S. Y. W. & Guindon, S. PartitionFinder: combined selection
- 1246 of partitioning schemes and substitution models for phylogenetic analyses. *Mol. Biol.*
- 1247 *Evol.* **29**, 1695–1701 (2012).
- 1248 41. Stamatakis, A. RAxML version 8: a tool for phylogenetic analysis and post-analysis of
- 1249 large phylogenies. *Bioinformatics* **30**, 1312–1313 (2014).

- 1250 42. Ott, M., Zola, J., Stamatakis, A. & Aluru, S. Large-scale maximum likelihood-based  
1251 phylogenetic analysis on the IBM BlueGene/L. *Proc. ACM/IEEE Supercomput. Conf.* **4**,  
1252 doi:10.1145/1362622.1362628 (2007).
- 1253 43. Pfeiffer, W. & Stamatakis, A. Hybrid MPI/Pthreads parallelization of the RAxML  
1254 phylogenetics code. *Parallel Distrib. Process. Work. Phd Forum (IPDPSW), 2010 IEEE*  
1255 *Int. Symp.* 1–8, (2010).
- 1256 44. Sanderson, M. J. r8s: inferring absolute rates of molecular evolution and divergence times  
1257 in the absence of a molecular clock. *Bioinformatics* **19**, 301–302 (2003).
- 1258 45. Ward, P. S., Brady, S. G., Fisher, B. L. & Schultz, T. R. The evolution of myrmicine ants:  
1259 Phylogeny and biogeography of a hyperdiverse ant clade (Hymenoptera: Formicidae).  
1260 *Syst. Entomol.* **40**, 61–81 (2015).
- 1261 46. Geml, J., Geiser, D. M. & Royse, D. J. Molecular evolution of *Agaricus* species based on  
1262 ITS and LSU rDNA sequences. *Mycol. Prog.* **3**, 157–176 (2004).
- 1263 47. Mikheyev, A. S., Mueller, U. G. & Abbot, P. Comparative dating of attine ant and  
1264 lepiotaceous cultivar phylogenies reveals coevolutionary synchrony and discord. *Am. Nat.*  
1265 **175**, E126–E133 (2010).
- 1266 48. Villesen, P., Murakami, T., Schultz, T. R. & Boomsma, J. J. Identifying the transition  
1267 between single and multiple mating of queens in fungus-growing ants. *Proc. Biol. Sci.*  
1268 **269**, 1541–1548 (2002).
- 1269 49. Helmkampf, M., Gadau, J. & Feldhaar, H. Population- and sociogenetic structure of the  
1270 leaf-cutter ant *Atta colombica* (Formicidae, Myrmicinae). *Insectes Soc.* **55**, 434–442  
1271 (2008).
- 1272 50. Villesen, P., Gertsch, P. J. & Boomsma, J. J. Microsatellite primers for fungus-growing  
1273 ants. *Mol. Ecol. Notes* **2**, 320–322 (2002).
- 1274 51. Hölldobler, B. & Wilson, E. O. *The Ants*. (Harvard University Press, 1990).
- 1275 52. Hughes, W. O. H., Sumner, S., Van Borm, S. & Boomsma, J. J. Worker caste  
1276 polymorphism has a genetic basis in *Acromyrmex* leaf-cutting ants. *Proc. Natl. Acad. Sci.*  
1277 *U. S. A.* **100**, 9394–9397 (2003).
- 1278 53. Weber, N. A. Fungus-growing ants. *Science* **153**, 587–604 (1966).
- 1279 54. Weber, N. A. *Gardening Ants: The Attines*. (American Philosophical Society, 1972).
- 1280 55. Chapela, I. H., Rehner, S. A., Schultz, T. R. & Mueller, U. G. Evolutionary History of the  
1281 Symbiosis Between Fungus-Growing Ants and Their Fungi. *Science* **266**, 1691–1694  
1282 (1994).
- 1283 56. Schultz, T. R. *et al.* The most relictual fungus-farming ant species cultivates the most  
1284 recently evolved and highly domesticated fungal symbiont species. *Am. Nat.* **185**, 693–  
1285 703 (2015).
- 1286 57. Masiulionis, V. E. *et al.* A Brazilian population of the asexual fungus-growing ant  
1287 *Mycocepurus smithii* (formicidae, myrmicinae, attini) cultivates fungal symbionts with  
1288 gongylidia-like structures. *PLoS One* **9**, e103800 (2014).
- 1289 58. Flicek, P. *et al.* Ensembl 2014. *Nucleic Acids Res.* **42**, 749–755 (2014).
- 1290 59. Ayala, F. J. & Coluzzi, M. Chromosome speciation: humans, *Drosophila*, and mosquitoes.  
1291 *Proc. Natl. Acad. Sci. U. S. A.* **102 Suppl**, 6535–6542 (2005).
- 1292 60. Larkin, D. M. *et al.* Breakpoint regions and homologous syntenic blocks in chromosomes  
1293 have different evolutionary histories. *Genome Res.* **19**, 770–777 (2009).
- 1294 61. Simola, D. F. *et al.* Social insect genomes exhibit dramatic evolution in gene composition  
1295 and regulation while preserving regulatory features linked to sociality. *Genome Res.* **23**,

- 1296 1235–1247 (2013).
- 1297 62. Felsenstein, J. Phylip: phylogeny inference package (version 3.2). *Cladistics* **5**, 164–166  
1298 (1989).
- 1299 63. Kent, W. J. BLAT – The BLAST-Like Alignment Tool. *Genome Res.* **12**, 656–664  
1300 (2002).
- 1301 64. Zhang, G. *et al.* Comparative genomics reveals insights into avian genome evolution and  
1302 adaptation. *Science.* **346**, 1311–1320 (2014).
- 1303 65. Librado, P., Vieira, F. G. & Rozas, J. BadiRate: estimating family turnover rates by  
1304 likelihood-based methods. *Bioinformatics* **28**, 279–81 (2012).
- 1305 66. Horton, P. *et al.* WoLF PSORT: Protein localization predictor. *Nucleic Acids Res.* **35**,  
1306 W585–W587 (2007).
- 1307 67. R Core Team. R: A Language and Environment for Statistical Computing. [www.R-](http://www.R-project.org)  
1308 [project.org](http://www.R-project.org) (2014).
- 1309 68. Katoh, K. & Toh, H. Recent developments in the MAFFT multiple sequence alignment  
1310 program. *Brief. Bioinform.* **9**, 286–298 (2008).
- 1311 69. Loytynoja, A. Phylogeny-aware alignment with PRANK. in *Multiple Sequence Alignment*  
1312 *Methods* (Russel, D. J.) 155–170 (Springer, 2014).
- 1313 70. Landan, G. & Graur, D. Local reliability measures from sets of co-optimal multiple  
1314 sequence alignments. *Pacific Symp. Biocomput.* **13**, 15–24 (2008).
- 1315 71. Yang, Z. PAML 4: phylogenetic analysis by maximum likelihood. *Mol. Biol. Evol.* **24**,  
1316 1586–1591 (2007).
- 1317 72. Shannon, P. *et al.* Cytoscape: a software environment for integrated models of  
1318 biomolecular interaction networks. *Genome Res.* **13**, 2498–2504 (2003).
- 1319 73. Maere, S., Heymans, K. & Kuiper, M. BiNGO: a Cytoscape plugin to assess  
1320 overrepresentation of gene ontology categories in biological networks. *Bioinformatics* **21**,  
1321 3448–3449 (2005).
- 1322 74. Lombard, V., Golaconda Ramulu, H., Drula, E., Coutinho, P. M. & Henrissat, B. The  
1323 carbohydrate-active enzymes database (CAZy) in 2013. *Nucleic Acids Res.* **42**, 490–495  
1324 (2014).
- 1325 75. Eddy, S. R. Accelerated profile HMM searches. *PLoS Comput. Biol.* **7**, e1002195 (2011).
- 1326 76. Zhao, Z., Liu, H., Wang, C. & Xu, J. Correction: comparative analysis of fungal genomes  
1327 reveals different plant cell wall degrading capacity in fungi. *BMC Genomics* **15**, 6 (2014).
- 1328 77. van den Brink, J. & de Vries, R. P. Fungal enzyme sets for plant polysaccharide  
1329 degradation. *Appl. Microbiol. Biotechnol.* **91**, 1477–92 (2011).
- 1330 78. Suzuki, R. & Shimodaira, H. Pvclust: an R package for assessing the uncertainty in  
1331 hierarchical clustering. *Bioinformatics* **22**, 1540–1542 (2006).
- 1332 79. De Fine Licht, H. H. *et al.* Laccase detoxification mediates the nutritional alliance  
1333 between leaf-cutting ants and fungus-garden symbionts. *Proc. Natl. Acad. Sci. U. S. A.*  
1334 **110**, 583–587 (2013).
- 1335 80. Sigrist, C. J. A. *et al.* PROSITE, a protein domain database for functional characterization  
1336 and annotation. *Nucleic Acids Res.* **38**, D161–D166 (2010).
- 1337 81. Schultz, J., Milpetz, F., Bork, P. & Ponting, C. P. SMART, a simple modular architecture  
1338 research tool: identification of signaling domains. *Proc. Natl. Acad. Sci. U. S. A.* **95**,  
1339 5857–5864 (1998).
- 1340 82. Letunic, I., Doerks, T. & Bork, P. SMART: recent updates, new developments and status  
1341 in 2015. *Nucleic Acids Res.* **43**, D257–D260 (2014).



1342 83. Marchler-Bauer, A. *et al.* CDD: NCBI's conserved domain database. *Nucleic Acids Res.*  
1343 **43**, D222–D226 (2015).

1344 84. Rice, P., Longden, I. & Bleasby, A. EMBOSS: the European Molecular Biology Open  
1345 Software Suite. *Trends Genet.* **16**, 276–277 (2000).

1346 85. Di Tommaso, P. *et al.* T-Coffee: a web server for the multiple sequence alignment of  
1347 protein and RNA sequences using structural information and homology extension. *Nucleic*  
1348 *Acids Res.* **39**, W13–W17 (2011).

1349 86. Notredame, C., Higgins, D. G. & Heringa, J. T-Coffee: a novel method for fast and  
1350 accurate multiple sequence alignment. *J. Mol. Biol.* **302**, 205–217 (2000).

1351 87. Revell, L. J. Phytools: an R package for phylogenetic comparative biology (and other  
1352 things). *Methods Ecol. Evol.* **3**, 217–223 (2012).

1353 88. Schmittschmitt, J. P. & Scholtz, J. M. The role of protein stability, solubility, and net  
1354 charge in amyloid fibril formation. *Protein Sci.* **12**, 2374–2378 (2003).

1355 89. Erthal, M., Peres Silva, C. & Samuels, R. I. Digestive enzymes of leaf-cutting ants,  
1356 *Acromyrmex subterraneus* (Hymenoptera: Formicidae: Attini): Distribution in the gut of  
1357 adult workers and partial characterization. *J. Insect Physiol.* **50**, 881–891 (2004).

1358 90. Biasini, M. *et al.* SWISS-MODEL: Modelling protein tertiary and quaternary structure  
1359 using evolutionary information. *Nucleic Acids Res.* **42**, W252–W258 (2014).

1360 91. Arnold, K., Bordoli, L., Kopp, J. & Schwede, T. The SWISS-MODEL workspace: a web-  
1361 based environment for protein structure homology modelling. *Bioinformatics* **22**, 195–201  
1362 (2006).

1363 92. Kiefer, F., Arnold, K., Künzli, M., Bordoli, L. & Schwede, T. The SWISS-MODEL  
1364 Repository and associated resources. *Nucleic Acids Res.* **37**, D387–D392 (2009).

1365 93. Waterhouse, A. M., Procter, J. B., Martin, D. M. a, Clamp, M. & Barton, G. J. Jalview  
1366 Version 2 –A multiple sequence alignment editor and analysis workbench. *Bioinformatics*  
1367 **25**, 1189–1191 (2009).

1368 94. Untergasser, A. *et al.* Primer3 –new capabilities and interfaces. *Nucleic Acids Res.* **40**, 1–  
1369 12 (2012).

1370 95. Mallona, I., Weiss, J. & Marcos, E.-C. pcrEfficiency: a Web tool for PCR amplification  
1371 efficiency prediction. *BMC Bioinformatics* **12**, 404 (2011).

1372  
1373  
1374  
1375  
1376  
1377  
1378
